# Supplementary material for: Variability and cost implications of three generations of the Roche LightCycler® 480
Source: PLoS One. 2018 Jan 12;13(1):e0190847. doi: 10.1371/journal.pone.0190847 (PMC5766094; doi:10.1371/journal.pone.0190847)
Supplement: S1 Dataset — (XLSX) [file pone.0190847.s001.xlsx]

## Sheet: data LC1
date	target	cp	fluorescence	plate	barcode	LC		date	target	cp	fluorescence	plate	barcode	LC		date	target	cp	fluorescence	plate	barcode	LC			date	target	cp	fluorescence	plate	barcode	LC
2013-10-03 13:05:13	Cryptosporidium spp.	34.82	5	MP20131003-02	03948651	LC 1.		2013-10-03 13:05:13	IC MFP3.	32.04	1.6	MP20131003-02	03948651	LC1		2013-10-03 13:05:13	D.fragilis	32.01	21.7	MP20131003-02	03948651	LC1			2013-10-03 13:05:13	G.lamblia	32.02	20.2	MP20131003-02	03948651	LC1
2013-10-04 13:58:29	Cryptosporidium spp.	34.55	4.4	MP20131004-07	03948662	LC 1.		2013-10-04 13:58:29	IC MFP3.	31.83	1.5	MP20131004-07	03948662	LC1		2013-10-04 13:58:29	D.fragilis	31.57	20.2	MP20131004-07	03948662	LC1			2013-10-04 13:58:29	G.lamblia	31.58	18.1	MP20131004-07	03948662	LC1
2013-10-09 12:21:52	Cryptosporidium spp.	34.12	4.5	MP20131009-02	03948680	LC 1.		2013-10-09 12:21:52	IC MFP3.	32.43	1.4	MP20131009-02	03948680	LC1		2013-10-09 12:21:52	D.fragilis	32.04	23	MP20131009-02	03948680	LC1			2013-10-09 12:21:52	G.lamblia	31.86	18.7	MP20131009-02	03948680	LC1
2013-10-10 12:03:34	Cryptosporidium spp.	34.43	4.4	MP20131010-02	04034149	LC 1.		2013-10-10 12:03:34	IC MFP3.	32.07	1.6	MP20131010-02	04034149	LC1		2013-10-10 12:03:34	D.fragilis	31.97	18.7	MP20131010-02	04034149	LC1			2013-10-10 12:03:34	G.lamblia	31.84	18.8	MP20131010-02	04034149	LC1
2013-10-11 12:14:05	Cryptosporidium spp.	34.51	5	MP20131011-02	04034142	LC 1.		2013-10-11 12:14:05	IC MFP3.	32.19	1.6	MP20131011-02	04034142	LC1		2013-10-11 12:14:05	D.fragilis	31.92	24.4	MP20131011-02	04034142	LC1			2013-10-11 12:14:05	G.lamblia	31.81	20.8	MP20131011-02	04034142	LC1
2013-10-14 13:12:30	Cryptosporidium spp.	34.17	5.1	MP20131014-02	04034102	LC 1.		2013-10-14 13:12:30	IC MFP3.	32.46	1.7	MP20131014-02	04034102	LC1		2013-10-14 13:12:30	D.fragilis	31.9	24.9	MP20131014-02	04034102	LC1			2013-10-14 13:12:30	G.lamblia	31.83	21.4	MP20131014-02	04034102	LC1
2013-10-16 13:17:12	Cryptosporidium spp.	34.32	4.9	MP20131016-04	04033238	LC 1.		2013-10-16 13:17:12	IC MFP3.	31.75	1.7	MP20131016-04	04033238	LC1		2013-10-16 13:17:12	D.fragilis	31.66	22.5	MP20131016-04	04033238	LC1			2013-10-16 13:17:12	G.lamblia	31.75	18.3	MP20131016-04	04033238	LC1
2013-10-18 13:41:10	Cryptosporidium spp.	34.45	4	MP20131018-02	04033232	LC 1.		2013-10-18 13:41:10	IC MFP3.	31.73	1.4	MP20131018-02	04033232	LC1		2013-10-18 13:41:10	D.fragilis	31.56	22	MP20131018-02	04033232	LC1			2013-10-18 13:41:10	G.lamblia	31.81	19.1	MP20131018-02	04033232	LC1
2013-10-21 12:51:51	Cryptosporidium spp.	34.59	4.4	MP20131021-04	04033217	LC 1.		2013-10-21 12:51:51	IC MFP3.	31.87	1.6	MP20131021-04	04033217	LC1		2013-10-21 12:51:51	D.fragilis	31.58	21.7	MP20131021-04	04033217	LC1			2013-10-21 12:51:51	G.lamblia	31.79	20.2	MP20131021-04	04033217	LC1
2013-11-01 14:27:50	Cryptosporidium spp.	33.71	4.6	MP20131101-03	04151528	LC 1.		2013-11-01 14:27:50	IC MFP3.	32.2	1.7	MP20131101-03	04151528	LC1		2013-10-27 12:13:04	D.fragilis	31.59	22.7	MP20131027-01	04033213	LC1			2013-11-01 14:27:50	G.lamblia	31.73	17.3	MP20131101-03	04151528	LC1
	mean	34.367	4.63						mean	32.057	1.58						mean	31.78	22.18							mean	31.802	19.29
date	target	cp	fluorescence	plate	barcode	LC		date	target	cp	fluorescence	plate	barcode	LC		date	target	cp	fluorescence	plate	barcode	LC			date	target	cp	fluorescence	plate	barcode	LC
2013-10-03 13:05:13	S. enterica	30.83	7.2	MP20131003-02	03948651	LC1		2013-10-03 13:05:13	IC MFP4.	32.09	1.6	MP20131003-02	03948651	LC1		2013-10-03 13:05:13	Y.enterocolitica	32.79	10.9	MP20131003-02	03948651	LC1			2013-10-03 13:05:13	STEC	31.53	24.3	MP20131003-02	03948651	LC1
2013-10-04 13:58:29	S. enterica	30.95	6	MP20131004-07	03948662	LC1		2013-10-04 13:58:29	IC MFP4.	32.26	1.5	MP20131004-07	03948662	LC1		2013-10-04 13:58:29	Y.enterocolitica	33.01	10.5	MP20131004-07	03948662	LC1			2013-10-04 13:58:29	STEC	31.19	20.6	MP20131004-07	03948662	LC1
2013-10-09 12:21:52	S. enterica	31.17	6.6	MP20131009-02	03948680	LC1		2013-10-09 12:21:52	IC MFP4.	32.46	1.7	MP20131009-02	03948680	LC1		2013-10-09 12:21:52	Y.enterocolitica	32.85	10.8	MP20131009-02	03948680	LC1			2013-10-09 12:21:52	STEC	31.24	21.9	MP20131009-02	03948680	LC1
2013-10-10 12:03:34	S. enterica	31.19	6.9	MP20131010-02	04034149	LC1		2013-10-10 12:03:34	IC MFP4.	32.18	1.7	MP20131010-02	04034149	LC1		2013-10-10 12:03:34	Y.enterocolitica	33.57	13.3	MP20131010-02	04034149	LC1			2013-10-10 12:03:34	STEC	31.7	25.9	MP20131010-02	04034149	LC1
2013-10-11 12:14:05	S. enterica	31.15	7.3	MP20131011-02	04034142	LC1		2013-10-11 12:14:05	IC MFP4.	32.08	1.6	MP20131011-02	04034142	LC1		2013-10-11 12:14:05	Y.enterocolitica	32.92	11.8	MP20131011-02	04034142	LC1			2013-10-11 12:14:05	STEC	31.49	25.1	MP20131011-02	04034142	LC1
2013-10-14 13:12:30	S. enterica	30.81	7.1	MP20131014-02	04034102	LC1		2013-10-14 13:12:30	IC MFP4.	32.42	1.8	MP20131014-02	04034102	LC1		2013-10-14 13:12:30	Y.enterocolitica	32.69	11.9	MP20131014-02	04034102	LC1			2013-10-14 13:12:30	STEC	31.05	24.7	MP20131014-02	04034102	LC1
2013-10-18 13:41:10	S. enterica	30.91	7.3	MP20131018-02	04033232	LC1		2013-10-16 13:17:12	IC MFP4.	32.27	1.8	MP20131016-04	04033238	LC1		2013-10-16 13:17:12	Y.enterocolitica	33.03	11.2	MP20131016-04	04033238	LC1			2013-10-16 13:17:12	STEC	31.19	27.2	MP20131016-04	04033238	LC1
2013-10-21 12:51:51	S. enterica	30.6	6.1	MP20131021-04	04033217	LC1		2013-10-18 13:41:10	IC MFP4.	32.11	1.7	MP20131018-02	04033232	LC1		2013-10-18 13:41:10	Y.enterocolitica	32.64	11.8	MP20131018-02	04033232	LC1			2013-10-18 13:41:10	STEC	30.59	20.1	MP20131018-02	04033232	LC1
2013-10-27 12:13:04	S. enterica	30.93	7.4	MP20131027-01	04033213	LC1		2013-10-21 12:51:51	IC MFP4.	32.18	1.9	MP20131021-04	04033217	LC1		2013-10-21 12:51:51	Y.enterocolitica	32.92	8.9	MP20131021-04	04033217	LC1			2013-10-21 12:51:51	STEC	31.2	21.8	MP20131021-04	04033217	LC1
2013-11-01 14:27:50	S. enterica	31.01	6.3	MP20131101-03	04151528	LC1		2013-11-01 14:27:50	IC MFP4.	32.48	1.7	MP20131101-03	04151528	LC1		2013-10-27 12:13:04	Y.enterocolitica	33.07	11.2	MP20131027-01	04033213	LC1			2013-10-27 12:13:04	STEC	30.92	26.5	MP20131027-01	04033213	LC1
	mean	30.955	6.82						mean	32.253	1.7						mean	32.949	11.23							mean	31.21	23.81
date	target	cp	fluorescence	plate	barcode	LC		date	target	cp	fluorescence	plate	barcode	LC		date	target	cp	fluorescence	plate	barcode	LC			date	target	cp	fluorescence	plate	barcode	LC
2013-10-03 13:05:13	S.dysenteriae/EIEC	33.61	6.7	MP20131003-02	03948651	LC1		2013-10-27 12:13:04	IC MFP1.	31.93	1.6	MP20131027-01	04033213	LC1		2013-10-03 13:05:13	C.jejuni	33.61	26.5	MP20131003-02	03948651	LC1			2013-10-03 13:05:13	C.coli	30.09	23.8	MP20131003-02	03948651	LC1
2013-10-04 13:58:29	S.dysenteriae/EIEC	33.09	6.1	MP20131004-07	03948662	LC1		2013-10-04 13:58:29	IC MFP1.	31.83	1.5	MP20131004-07	03948662	LC1		2013-10-04 13:58:29	C.jejuni	33.47	24.8	MP20131004-07	03948662	LC1			2013-10-04 13:58:29	C.coli	30.27	23.3	MP20131004-07	03948662	LC1
2013-10-09 12:21:52	S.dysenteriae/EIEC	33.24	7	MP20131009-02	03948680	LC1		2013-10-09 12:21:52	IC MFP1.	32.33	1.7	MP20131009-02	03948680	LC1		2013-10-09 12:21:52	C.jejuni	34.05	26.4	MP20131009-02	03948680	LC1			2013-10-09 12:21:52	C.coli	30.46	25.9	MP20131009-02	03948680	LC1
2013-10-10 12:03:34	S.dysenteriae/EIEC	33.29	6.6	MP20131010-02	04034149	LC1		2013-10-03 13:05:13	IC MFP1.	32.52	1.5	MP20131003-02	03948651	LC1		2013-10-10 12:03:34	C.jejuni	33.73	26.5	MP20131010-02	04034149	LC1			2013-10-10 12:03:34	C.coli	30.59	26.2	MP20131010-02	04034149	LC1
2013-10-11 12:14:05	S.dysenteriae/EIEC	33.91	6.9	MP20131011-02	04034142	LC1		2013-10-18 13:41:10	IC MFP1.	32.17	1.5	MP20131018-02	04033232	LC1		2013-10-11 12:14:05	C.jejuni	33.88	26.7	MP20131011-02	04034142	LC1			2013-10-11 12:14:05	C.coli	30.21	25	MP20131011-02	04034142	LC1
2013-10-14 13:12:30	S.dysenteriae/EIEC	34.02	6.9	MP20131014-02	04034102	LC1		2013-10-10 12:03:34	IC MFP1.	32.15	1.5	MP20131010-02	04034149	LC1		2013-10-14 13:12:30	C.jejuni	33.6	26.2	MP20131014-02	04034102	LC1			2013-10-14 13:12:30	C.coli	30.51	26	MP20131014-02	04034102	LC1
2013-10-16 13:17:12	S.dysenteriae/EIEC	33.65	6.6	MP20131016-04	04033238	LC1		2013-10-21 12:51:51	IC MFP1.	31.8	1.4	MP20131021-04	04033217	LC1		2013-10-16 13:17:12	C.jejuni	33.6	27.3	MP20131016-04	04033238	LC1			2013-10-16 13:17:12	C.coli	30.32	26.2	MP20131016-04	04033238	LC1
2013-10-18 13:41:10	S.dysenteriae/EIEC	33.44	6.8	MP20131018-02	04033232	LC1		2013-10-11 12:14:05	IC MFP1.	32.23	1.5	MP20131011-02	04034142	LC1		2013-10-18 13:41:10	C.jejuni	33.67	26.7	MP20131018-02	04033232	LC1			2013-10-18 13:41:10	C.coli	30.07	25	MP20131018-02	04033232	LC1
2013-10-21 12:51:51	S.dysenteriae/EIEC	33.17	5.9	MP20131021-04	04033217	LC1		2013-10-14 13:12:30	IC MFP1.	32.42	1.6	MP20131014-02	04034102	LC1		2013-10-27 12:13:04	C.jejuni	33.63	27.4	MP20131027-01	04033213	LC1			2013-10-21 12:51:51	C.coli	30.12	20.9	MP20131021-04	04033217	LC1
2013-10-27 12:13:04	S.dysenteriae/EIEC	33.18	6.8	MP20131027-01	04033213	LC1		2013-10-16 13:17:12	IC MFP1.	32.15	1.6	MP20131016-04	04033238	LC1		2013-11-01 14:27:50	C.jejuni	33.95	26.6	MP20131101-03	04151528	LC1			2013-10-27 12:13:04	C.coli	30.27	25.4	MP20131027-01	04033213	LC1
	mean	33.46	6.63						mean	32.153	1.54						mean	33.719	26.51							mean	30.291	24.77
								date	target	cp	fluorescence	plate	barcode	LC
								2013-10-03 13:05:13	IC MFP2.	32.16	1.4	MP20131003-02	03948651	LC1
								2013-10-04 13:58:29	IC MFP2.	32.1	1.3	MP20131004-07	03948662	LC1
								2013-10-09 12:21:52	IC MFP2.	32.48	1.4	MP20131009-02	03948680	LC1
								2013-10-10 12:03:34	IC MFP2.	32.13	1.5	MP20131010-02	04034149	LC1
								2013-10-11 12:14:05	IC MFP2.	32.2	1.5	MP20131011-02	04034142	LC1
								2013-10-14 13:12:30	IC MFP2.	32.46	1.5	MP20131014-02	04034102	LC1
								2013-10-16 13:17:12	IC MFP2.	32.04	1.4	MP20131016-04	04033238	LC1
								2013-10-18 13:41:10	IC MFP2.	32.24	1.5	MP20131018-02	04033232	LC1
								2013-10-21 12:51:51	IC MFP2.	31.71	1	MP20131021-04	04033217	LC1
								2013-10-27 12:13:04	IC MFP2.	31.92	1.6	MP20131027-01	04033213	LC1
									mean	32.144	1.41

## Sheet: data LC4
date	target	cp	fluorescence	plate	barcode	LC		date	target	cp	fluorescence	plate	barcode	LC		date	target	cp	fluorescence	plate	barcode	LC		date	target	cp	fluorescence	plate	barcode	LC
2013-10-02 14:39:25	C.coli	30.42	23.2	MP20131002-03	03948657	LC4		2013-10-02 14:39:25	C.jejuni	33.94	28.2	MP20131002-03	03948657	LC4		2013-10-02 14:39:25	Cryptosporidium spp.	34.24	8.1	MP20131002-03	03948657	LC4		2013-10-02 14:39:25	IC MFP1.	32.32	6.5	MP20131002-03	03948657	LC4
2013-10-15 13:18:43	C.coli	30.58	21.1	MP20131015-04	03948472	LC4		2013-10-15 13:18:43	C.jejuni	33.99	30.3	MP20131015-04	03948472	LC4		2013-10-04 13:13:59	Cryptosporidium spp.	34.15	7.6	MP20131004-01	03948667	LC4		2013-10-15 13:18:43	IC MFP1.	32.56	6	MP20131015-04	03948472	LC4
2013-10-17 11:51:19	C.coli	30.33	24.5	MP20131017-04	04033236	LC4		2013-10-17 11:51:19	C.jejuni	33.71	32.6	MP20131017-04	04033236	LC4		2013-10-14 13:31:19	Cryptosporidium spp.	34.52	8.3	MP20131014-05	04034100	LC4		2013-10-17 11:51:19	IC MFP1.	32.02	6.4	MP20131017-04	04033236	LC4
2013-10-22 14:12:13	C.coli	30.53	20.1	MP20131022-06	04033202	LC4		2013-10-22 14:12:13	C.jejuni	33.82	30.3	MP20131022-06	04033202	LC4		2013-10-15 13:18:43	Cryptosporidium spp.	34.22	7.8	MP20131015-04	03948472	LC4		2013-10-22 14:12:13	IC MFP1.	32.2	6.4	MP20131022-06	04033202	LC4
2013-10-30 15:46:21	C.coli	30.61	24	MP20131030-04	04159737	LC4		2013-10-30 15:46:21	C.jejuni	33.78	30.6	MP20131030-04	04159737	LC4		2013-10-17 11:51:19	Cryptosporidium spp.	34.96	7.7	MP20131017-04	04033236	LC4		2013-10-30 15:46:21	IC MFP1.	32.14	6.8	MP20131030-04	04159737	LC4
2013-11-04 13:43:14	C.coli	30.93	22.9	MP20131104-03	04159730	LC4		2013-11-04 13:43:14	C.jejuni	34.63	30.6	MP20131104-03	04159730	LC4		2013-10-18 13:29:08	Cryptosporidium spp.	34.1	7.9	MP20131018-01	04033233	LC4		2013-11-04 13:43:14	IC MFP1.	32.74	7	MP20131104-03	04159730	LC4
2013-11-05 12:30:20	C.coli	30.86	23.6	MP20131105-02	04151525	LC4		2013-11-05 12:30:20	C.jejuni	34.25	28.5	MP20131105-02	04151525	LC4		2013-10-22 14:12:13	Cryptosporidium spp.	33.95	8.5	MP20131022-06	04033202	LC4		2013-11-05 12:30:20	IC MFP1.	32.27	6.5	MP20131105-02	04151525	LC4
2013-11-06 13:42:16	C.coli	30.14	25.92	MP20131106-05	04151522	LC4		2013-11-06 13:42:16	C.jejuni	33.83	32.87	MP20131106-05	04151522	LC4		2013-11-04 13:43:14	Cryptosporidium spp.	33.63	9.3	MP20131104-03	04159730	LC4		2013-11-06 13:42:16	IC MFP1.	32.59	6.1	MP20131106-05	04151522	LC4
2013-11-08 13:27:51	C.coli	30.04	20.09	MP20131108-01	04033249	LC4		2013-11-08 13:27:51	C.jejuni	33.2	26.41	MP20131108-01	04033249	LC4		2013-11-05 12:30:20	Cryptosporidium spp.	34.32	7.9	MP20131105-02	04151525	LC4		2013-11-08 13:27:51	IC MFP1.	32.68	6	MP20131108-01	04033249	LC4
2013-11-11 13:20:31	C.coli	30.21	18.2	MP20131111-01	04033246	LC4		2013-11-13 12:29:35	C.jejuni	33.49	27.2	MP20131113-01	04159719	LC4		2013-11-06 13:42:16	Cryptosporidium spp.	33.89	8.4	MP20131106-05	04151522	LC4		2013-11-13 12:29:35	IC MFP1.	32.52	6.1	MP20131113-01	04159719	LC4
	mean	30.465	22.361						mean	33.864	29.758						mean	34.198	8.15						mean	32.404	6.38
date	target	cp	fluorescence	plate	barcode	LC		date	target	cp	fluorescence	plate	barcode	LC		date	target	cp	fluorescence	plate	barcode	LC		date	target	cp	fluorescence	plate	barcode	LC
2013-10-02 14:39:25	G.lamblia	31.7	18.8	MP20131002-03	03948657	LC4		2013-10-02 14:39:25	D.fragilis	31.78	24.7	MP20131002-03	03948657	LC4		2013-10-02 14:39:25	S. enterica	31.31	11.2	MP20131002-03	03948657	LC4		2013-10-02 14:39:25	IC MFP2.	32.46	6.1	MP20131002-03	03948657	LC4
2013-10-15 13:18:43	G.lamblia	31.95	16.9	MP20131015-04	03948472	LC4		2013-10-15 13:18:43	D.fragilis	31.88	23.2	MP20131015-04	03948472	LC4		2013-10-15 13:18:43	S. enterica	31.46	13.3	MP20131015-04	03948472	LC4		2013-10-15 13:18:43	IC MFP2.	32.54	6.2	MP20131015-04	03948472	LC4
2013-10-17 11:51:19	G.lamblia	31.93	18.8	MP20131017-04	04033236	LC4		2013-10-17 11:51:19	D.fragilis	31.85	20.6	MP20131017-04	04033236	LC4		2013-10-17 11:51:19	S. enterica	30.83	12.6	MP20131017-04	04033236	LC4		2013-10-17 11:51:19	IC MFP2.	32.07	6.1	MP20131017-04	04033236	LC4
2013-10-22 14:12:13	G.lamblia	31.82	17.4	MP20131022-06	04033202	LC4		2013-10-22 14:12:13	D.fragilis	31.57	22.3	MP20131022-06	04033202	LC4		2013-10-22 14:12:13	S. enterica	30.97	12.5	MP20131022-06	04033202	LC4		2013-10-22 14:12:13	IC MFP2.	32.2	5.6	MP20131022-06	04033202	LC4
2013-10-30 15:46:21	G.lamblia	30.22	15.8	MP20131030-04	04159737	LC4		2013-10-30 15:46:21	D.fragilis	29.38	17.4	MP20131030-04	04159737	LC4		2013-10-30 15:46:21	S. enterica	30.82	12.5	MP20131030-04	04159737	LC4		2013-10-30 15:46:21	IC MFP2.	32.27	6.6	MP20131030-04	04159737	LC4
2013-11-04 13:43:14	G.lamblia	31.65	19.1	MP20131104-03	04159730	LC4		2013-11-04 13:43:14	D.fragilis	31.72	25.2	MP20131104-03	04159730	LC4		2013-11-04 13:43:14	S. enterica	31.65	12.9	MP20131104-03	04159730	LC4		2013-11-04 13:43:14	IC MFP2.	32.72	6.3	MP20131104-03	04159730	LC4
2013-11-05 12:30:20	G.lamblia	31.85	17.8	MP20131105-02	04151525	LC4		2013-11-05 12:30:20	D.fragilis	32.12	22.2	MP20131105-02	04151525	LC4		2013-11-05 12:30:20	S. enterica	32.03	10.1	MP20131105-02	04151525	LC4		2013-11-06 13:42:16	IC MFP2.	32.59	6.3	MP20131106-05	04151522	LC4
2013-11-06 13:42:16	G.lamblia	31.78	18.97	MP20131106-05	04151522	LC4		2013-11-06 13:42:16	D.fragilis	31.7	22.37	MP20131106-05	04151522	LC4		2013-11-06 13:42:16	S. enterica	31.1	14.1	MP20131106-05	04151522	LC4		2013-11-08 13:27:51	IC MFP2.	32.56	6.4	MP20131108-01	04033249	LC4
2013-11-08 13:27:51	G.lamblia	30.48	19.1	MP20131108-01	04033249	LC4		2013-11-08 13:27:51	D.fragilis	30.23	19.71	MP20131108-01	04033249	LC4		2013-11-08 13:27:51	S. enterica	30.92	9.9	MP20131108-01	04033249	LC4		2013-11-11 13:20:31	IC MFP2.	32.59	6.3	MP20131111-01	04033246	LC4
2013-11-11 13:20:31	G.lamblia	30.1	18.8	MP20131111-01	04033246	LC4		2013-11-11 13:20:31	D.fragilis	29.5	19.87	MP20131111-01	04033246	LC4		2013-11-11 13:20:31	S. enterica	30.69	12.54	MP20131111-01	04033246	LC4		2013-11-13 12:29:35	IC MFP2.	32.44	6.3	MP20131113-01	04159719	LC4
	mean	31.348	18.147						mean	31.173	21.755						mean	31.178	12.164						mean	32.444	6.22
date	target	cp	fluorescence	plate	barcode	LC		date	target	cp	fluorescence	plate	barcode	LC		date	target	cp	fluorescence	plate	barcode	LC		date	target	cp	fluorescence	plate	barcode	LC
2013-10-02 14:39:25	STEC	31.57	20.8	MP20131002-03	03948657	LC4		2013-10-02 14:39:25	Y.enterocolitica	32.96	14.1	MP20131002-03	03948657	LC4		2013-10-02 14:39:25	S.dysenteriae/EIEC	33.47	10.6	MP20131002-03	03948657	LC4		2013-10-02 14:39:25	IC MFP3.	32.27	6.5	MP20131002-03	03948657	LC4
2013-10-15 13:18:43	STEC	31.19	16.5	MP20131015-04	03948472	LC4		2013-10-15 13:18:43	Y.enterocolitica	32.83	13	MP20131015-04	03948472	LC4		2013-10-15 13:18:43	S.dysenteriae/EIEC	33.78	11.7	MP20131015-04	03948472	LC4		2013-10-15 13:18:43	IC MFP3.	32.45	5.9	MP20131015-04	03948472	LC4
2013-10-17 11:51:19	STEC	31.19	23.1	MP20131017-04	04033236	LC4		2013-10-17 11:51:19	Y.enterocolitica	32.79	12.2	MP20131017-04	04033236	LC4		2013-10-17 11:51:19	S.dysenteriae/EIEC	33.57	11.8	MP20131017-04	04033236	LC4		2013-10-17 11:51:19	IC MFP3.	31.66	6.1	MP20131017-04	04033236	LC4
2013-10-22 14:12:13	STEC	31.89	19.2	MP20131022-06	04033202	LC4		2013-10-22 14:12:13	Y.enterocolitica	33.22	13	MP20131022-06	04033202	LC4		2013-10-22 14:12:13	S.dysenteriae/EIEC	33.1	10.9	MP20131022-06	04033202	LC4		2013-10-22 14:12:13	IC MFP3.	32.21	5.8	MP20131022-06	04033202	LC4
2013-10-30 15:46:21	STEC	31.24	18	MP20131030-04	04159737	LC4		2013-10-30 15:46:21	Y.enterocolitica	32.96	13.7	MP20131030-04	04159737	LC4		2013-11-04 13:43:14	S.dysenteriae/EIEC	33.5	10.3	MP20131104-03	04159730	LC4		2013-10-30 15:46:21	IC MFP3.	32.15	5.8	MP20131030-04	04159737	LC4
2013-11-04 13:43:14	STEC	31.76	20.5	MP20131104-03	04159730	LC4		2013-11-04 13:43:14	Y.enterocolitica	33.39	12.93	MP20131104-03	04159730	LC4		2013-11-05 12:30:20	S.dysenteriae/EIEC	34.07	10.1	MP20131105-02	04151525	LC4		2013-11-04 13:43:14	IC MFP3.	32.77	6.5	MP20131104-03	04159730	LC4
2013-11-05 12:30:20	STEC	31.19	19.3	MP20131105-02	04151525	LC4		2013-11-05 12:30:20	Y.enterocolitica	33.22	12.4	MP20131105-02	04151525	LC4		2013-11-06 13:42:16	S.dysenteriae/EIEC	33.45	11.08	MP20131106-05	04151522	LC4		2013-11-05 12:30:20	IC MFP3.	32.14	5.6	MP20131105-02	04151525	LC4
2013-11-06 13:42:16	STEC	31.1	20	MP20131106-05	04151522	LC4		2013-11-06 13:42:16	Y.enterocolitica	32.79	13.96	MP20131106-05	04151522	LC4		2013-11-08 13:27:51	S.dysenteriae/EIEC	33.68	8.7	MP20131108-01	04033249	LC4		2013-11-06 13:42:16	IC MFP3.	32.72	5.7	MP20131106-05	04151522	LC4
2013-11-08 13:27:51	STEC	30.71	18.05	MP20131108-01	04033249	LC4		2013-11-08 13:27:51	Y.enterocolitica	32.54	11.68	MP20131108-01	04033249	LC4		2013-11-11 13:20:31	S.dysenteriae/EIEC	33.89	9.4	MP20131111-01	04033246	LC4		2013-11-08 13:27:51	IC MFP3.	32.03	6.5	MP20131108-01	04033249	LC4
2013-11-11 13:20:31	STEC	31.23	19.7	MP20131111-01	04033246	LC4		2013-11-11 13:20:31	Y.enterocolitica	32.5	11.14	MP20131111-01	04033246	LC4		2013-11-13 12:29:35	S.dysenteriae/EIEC	33.3	8.5	MP20131113-01	04159719	LC4		2013-11-11 13:20:31	IC MFP3.	31.82	6.3	MP20131111-01	04033246	LC4
	mean	31.307	19.515						mean	32.92	12.811						mean	33.581	10.308						mean	32.222	6.07
																								date	target	cp	fluorescence	plate	barcode	LC
																								2013-10-02 14:39:25	IC MFP4.	32.12	6.9	MP20131002-03	03948657	LC4
																								2013-10-15 13:18:43	IC MFP4.	32.57	7.4	MP20131015-04	03948472	LC4
																								2013-10-17 11:51:19	IC MFP4.	32.11	6.5	MP20131017-04	04033236	LC4
																								2013-10-22 14:12:13	IC MFP4.	32.23	7	MP20131022-06	04033202	LC4
																								2013-10-30 15:46:21	IC MFP4.	30.53	7.3	MP20131030-04	04159737	LC4
																								2013-11-04 13:43:14	IC MFP4.	32.58	6.9	MP20131104-03	04159730	LC4
																								2013-11-05 12:30:20	IC MFP4.	32.67	6.2	MP20131105-02	04151525	LC4
																								2013-11-06 13:42:16	IC MFP4.	32.8	6.9	MP20131106-05	04151522	LC4
																								2013-11-08 13:27:51	IC MFP4.	31.07	7.1	MP20131108-01	04033249	LC4
																								2013-11-11 13:20:31	IC MFP4.	30.99	7.6	MP20131111-01	04033246	LC4
																									mean	31.967	6.98

## Sheet: data LC6
date	target	cp	fluorescence	plate	barcode	LC		date	target	cp	fluorescence	plate	barcode	LC		date	target	cp	fluorescence	plate	barcode	LC		date	target	cp	fluorescence	plate	barcode	LC
2013-10-07 13:40:56	C.coli	30.45	31.8	MP20131007-01	03948674	LC6		2013-10-07 13:40:56	C.jejuni	33.9	39.03	MP20131007-01	03948674	LC6		2013-10-07 13:40:56	Cryptosporidium spp.	33.95	13.1	MP20131007-01	03948674	LC6		2013-10-07 13:40:56	IC MFP1.	32.25	8.2	MP20131007-01	03948674	LC6
2013-10-15 16:36:31	C.coli	30.48	29.5	MP20131015-11	04033221	LC6		2013-10-15 16:36:31	C.jejuni	33.9	38.6	MP20131015-11	04033221	LC6		2013-10-15 16:36:31	Cryptosporidium spp.	33.89	14.1	MP20131015-11	04033221	LC6		2013-10-15 16:36:31	IC MFP1.	32.46	8.5	MP20131015-11	04033221	LC6
2013-10-16 12:47:20	C.coli	30.61	35.5	MP20131016-03	04033239	LC6		2013-10-16 12:47:20	C.jejuni	33.99	43.3	MP20131016-03	04033239	LC6		2013-10-16 12:47:20	Cryptosporidium spp.	33.74	13.7	MP20131016-03	04033239	LC6		2013-10-16 12:47:20	IC MFP1.	32.23	8.9	MP20131016-03	04033239	LC6
2013-10-23 13:35:04	C.coli	30.2	31.8	MP20131023-03	04033200	LC6		2013-10-23 13:35:04	C.jejuni	33.85	41	MP20131023-03	04033200	LC6		2013-10-23 13:35:04	Cryptosporidium spp.	34.18	12.4	MP20131023-03	04033200	LC6		2013-10-23 13:35:04	IC MFP1.	32.46	8.4	MP20131023-03	04033200	LC6
2013-10-27 12:36:46	C.coli	30.44	32.7	MP20131027-02	04033212	LC6		2013-10-27 12:36:46	C.jejuni	33.88	40.6	MP20131027-02	04033212	LC6		2013-10-27 12:36:46	Cryptosporidium spp.	34.16	14	MP20131027-02	04033212	LC6		2013-10-27 12:36:46	IC MFP1.	32.2	8.6	MP20131027-02	04033212	LC6
2013-11-11 14:55:02	C.coli	30.24	30.69	MP20131111-02	04033245	LC6		2013-11-22 13:07:51	C.jejuni	33.59	44	MP20131122-01	04151505	LC6		2013-11-22 13:07:51	Cryptosporidium spp.	29.1	11.6	MP20131122-01	04151505	LC6		2013-11-11 14:55:02	IC MFP1.	32.11	10.6	MP20131111-02	04033245	LC6
2013-11-22 13:07:51	C.coli	30.13	36.4	MP20131122-01	04151505	LC6		2013-11-25 12:05:33	C.jejuni	33.45	39.9	MP20131125-01	04151532	LC6		2013-11-25 12:05:33	Cryptosporidium spp.	29.02	11.2	MP20131125-01	04151532	LC6		2013-11-22 13:07:51	IC MFP1.	31.96	8.9	MP20131122-01	04151505	LC6
2013-11-25 12:05:33	C.coli	30.45	34.1	MP20131125-01	04151532	LC6		2013-12-04 14:07:56	C.jejuni	33.31	40.5	MP20131204-02	04159708	LC6		2013-12-04 14:07:56	Cryptosporidium spp.	29.01	11.4	MP20131204-02	04159708	LC6		2013-11-25 12:05:33	IC MFP1.	32.27	8.5	MP20131125-01	04151532	LC6
2013-12-04 14:07:56	C.coli	30.1	33.5	MP20131204-02	04159708	LC6		2013-12-05 13:55:43	C.jejuni	33.14	42	MP20131205-03	04159704	LC6		2013-12-05 13:55:43	Cryptosporidium spp.	28.75	10.9	MP20131205-03	04159704	LC6		2013-12-04 14:07:56	IC MFP1.	31.9	9.1	MP20131204-02	04159708	LC6
2013-12-05 13:55:43	C.coli	30.12	32.1	MP20131205-03	04159704	LC6		2013-12-09 12:29:13	C.jejuni	32.93	39.4	MP20131209-01	04159703	LC6		2013-12-06 12:14:31	Cryptosporidium spp.	29.15	11.6	MP20131206-02	04151544	LC6		2013-12-05 13:55:43	IC MFP1.	31.9	9	MP20131205-03	04159704	LC6
	mean	30.322	32.809						mean	33.594	40.833						mean	31.495	12.4						mean	32.174	8.87
date	target	cp	fluorescence	plate	barcode	LC		date	target	cp	fluorescence	plate	barcode	LC		date	target	cp	fluorescence	plate	barcode	LC		date	target	cp	fluorescence	plate	barcode	LC
2013-10-07 13:40:56	G.lamblia	31.9	24.6	MP20131007-01	03948674	LC6		2013-11-11 14:55:02	D.fragilis	29.09	23.5	MP20131111-02	04033245	LC6		2013-10-07 13:40:56	S. enterica	31.04	20.68	MP20131007-01	03948674	LC6		2013-10-07 13:40:56	IC MFP2.	32.25	7.8	MP20131007-01	03948674	LC6
2013-10-15 16:36:31	G.lamblia	31.83	25.3	MP20131015-11	04033221	LC6		2013-11-22 13:07:51	D.fragilis	29.87	24.2	MP20131122-01	04151505	LC6		2013-10-15 16:36:31	S. enterica	31.24	17.7	MP20131015-11	04033221	LC6		2013-10-15 16:36:31	IC MFP2.	32.46	7.6	MP20131015-11	04033221	LC6
2013-10-16 12:47:20	G.lamblia	31.94	25.9	MP20131016-03	04033239	LC6		2013-11-25 12:05:33	D.fragilis	29.81	26.7	MP20131125-01	04151532	LC6		2013-10-16 12:47:20	S. enterica	31.06	21	MP20131016-03	04033239	LC6		2013-10-16 12:47:20	IC MFP2.	32.06	8.8	MP20131016-03	04033239	LC6
2013-10-23 13:35:04	G.lamblia	31.57	23.8	MP20131023-03	04033200	LC6		2013-12-04 14:07:56	D.fragilis	29.76	24.1	MP20131204-02	04159708	LC6		2013-10-23 13:35:04	S. enterica	31.26	20.7	MP20131023-03	04033200	LC6		2013-10-23 13:35:04	IC MFP2.	32.25	8.7	MP20131023-03	04033200	LC6
2013-10-27 12:36:46	G.lamblia	31.8	26.7	MP20131027-02	04033212	LC6		2013-12-05 13:55:43	D.fragilis	29.63	25.3	MP20131205-03	04159704	LC6		2013-10-27 12:36:46	S. enterica	30.93	19.1	MP20131027-02	04033212	LC6		2013-10-27 12:36:46	IC MFP2.	32.24	9.2	MP20131027-02	04033212	LC6
2013-11-11 14:55:02	G.lamblia	29.94	25	MP20131111-02	04033245	LC6		2013-12-06 12:14:31	D.fragilis	29.99	24.9	MP20131206-02	04151544	LC6		2013-11-11 14:55:02	S. enterica	30.57	22.7	MP20131111-02	04033245	LC6		2013-11-11 14:55:02	IC MFP2.	32.27	11.3	MP20131111-02	04033245	LC6
2013-11-22 13:07:51	G.lamblia	29.96	24.8	MP20131122-01	04151505	LC6		2013-12-10 15:03:48	D.fragilis	29.13	23.1	MP20131210-02	04033818	LC6		2013-11-22 13:07:51	S. enterica	30.5	15.2	MP20131122-01	04151505	LC6		2013-11-22 13:07:51	IC MFP2.	31.85	9.4	MP20131122-01	04151505	LC6
2013-11-25 12:05:33	G.lamblia	30.58	23.7	MP20131125-01	04151532	LC6		2013-12-18 14:22:41	D.fragilis	29.27	23.2	MP20131218-02	04151516	LC6		2013-11-25 12:05:33	S. enterica	30.31	15.1	MP20131125-01	04151532	LC6		2013-11-25 12:05:33	IC MFP2.	32	9.7	MP20131125-01	04151532	LC6
2013-12-04 14:07:56	G.lamblia	30.08	22.3	MP20131204-02	04159708	LC6		2013-12-19 13:47:11	D.fragilis	29.24	24.2	MP20131219-04	04033835	LC6		2013-12-04 14:07:56	S. enterica	30.73	17	MP20131204-02	04159708	LC6		2013-12-04 14:07:56	IC MFP2.	31.71	9.6	MP20131204-02	04159708	LC6
2013-12-05 13:55:43	G.lamblia	30.19	19.9	MP20131205-03	04159704	LC6		2013-12-20 13:49:44	D.fragilis	29.83	25	MP20131220-05	04033849	LC6		2013-12-05 13:55:43	S. enterica	30.77	14.6	MP20131205-03	04159704	LC6		2013-12-05 13:55:43	IC MFP2.	32.03	9.4	MP20131205-03	04159704	LC6
	mean	30.979	24.2						mean	29.562	24.42						mean	30.841	18.378						mean	32.112	9.15
date	target	cp	fluorescence	plate	barcode	LC		date	target	cp	fluorescence	plate	barcode	LC		date	target	cp	fluorescence	plate	barcode	LC		date	target	cp	fluorescence	plate	barcode	LC
2013-10-07 13:40:56	STEC	30.83	34.6	MP20131007-01	03948674	LC6		2013-10-07 13:40:56	Y.enterocolitica	32.62	16.7	MP20131007-01	03948674	LC6		2013-10-07 13:40:56	S.dysenteriae/EIEC	33.56	16.8	MP20131007-01	03948674	LC6		2013-10-07 13:40:56	IC MFP3.	32.45	9.1	MP20131007-01	03948674	LC6
2013-10-15 16:36:31	STEC	31.26	36.3	MP20131015-11	04033221	LC6		2013-10-15 16:36:31	Y.enterocolitica	32.33	17.2	MP20131015-11	04033221	LC6		2013-10-15 16:36:31	S.dysenteriae/EIEC	33.1	19.1	MP20131015-11	04033221	LC6		2013-10-15 16:36:31	IC MFP3.	32.16	9.9	MP20131015-11	04033221	LC6
2013-10-16 12:47:20	STEC	31.12	32.8	MP20131016-03	04033239	LC6		2013-10-16 12:47:20	Y.enterocolitica	32.8	18.3	MP20131016-03	04033239	LC6		2013-10-16 12:47:20	S.dysenteriae/EIEC	33.49	20	MP20131016-03	04033239	LC6		2013-10-16 12:47:20	IC MFP3.	32.02	9.6	MP20131016-03	04033239	LC6
2013-10-23 13:35:04	STEC	29.97	28.4	MP20131023-03	04033200	LC6		2013-10-23 13:35:04	Y.enterocolitica	32.91	17.9	MP20131023-03	04033200	LC6		2013-10-23 13:35:04	S.dysenteriae/EIEC	32.32	17.6	MP20131023-03	04033200	LC6		2013-10-27 12:36:46	IC MFP3.	32.22	11.5	MP20131027-02	04033212	LC6
2013-10-27 12:36:46	STEC	31.14	40.5	MP20131027-02	04033212	LC6		2013-10-27 12:36:46	Y.enterocolitica	32.94	19.2	MP20131027-02	04033212	LC6		2013-10-27 12:36:46	S.dysenteriae/EIEC	33.41	19.4	MP20131027-02	04033212	LC6		2013-11-11 14:55:02	IC MFP3.	31.7	8.5	MP20131111-02	04033245	LC6
2013-11-11 14:55:02	STEC	30.95	30.7	MP20131111-02	04033245	LC6		2013-11-11 14:55:02	Y.enterocolitica	31.36	26.2	MP20131111-02	04033245	LC6		2013-11-11 14:55:02	S.dysenteriae/EIEC	33.2	18.3	MP20131111-02	04033245	LC6		2013-11-22 13:07:51	IC MFP3.	31.62	9.3	MP20131122-01	04151505	LC6
2013-11-22 13:07:51	STEC	30.57	33.2	MP20131122-01	04151505	LC6		2013-11-22 13:07:51	Y.enterocolitica	32.04	17.6	MP20131122-01	04151505	LC6		2013-11-25 12:05:33	S.dysenteriae/EIEC	32.02	17.9	MP20131125-01	04151532	LC6		2013-11-25 12:05:33	IC MFP3.	31.7	8.5	MP20131125-01	04151532	LC6
2013-11-25 12:05:33	STEC	30.8	34	MP20131125-01	04151532	LC6		2013-11-25 12:05:33	Y.enterocolitica	32.28	17.5	MP20131125-01	04151532	LC6		2013-12-04 14:07:56	S.dysenteriae/EIEC	32.46	16.5	MP20131204-02	04159708	LC6		2013-12-04 14:07:56	IC MFP3.	31.6	9.3	MP20131204-02	04159708	LC6
2013-12-04 14:07:56	STEC	30.84	32.8	MP20131204-02	04159708	LC6		2013-12-04 14:07:56	Y.enterocolitica	32.21	17.8	MP20131204-02	04159708	LC6		2013-12-05 13:55:43	S.dysenteriae/EIEC	32.27	15.3	MP20131205-03	04159704	LC6		2013-12-05 13:55:43	IC MFP3.	31.24	7.7	MP20131205-03	04159704	LC6
2013-12-05 13:55:43	STEC	30.66	26.9	MP20131205-03	04159704	LC6		2013-12-05 13:55:43	Y.enterocolitica	32.1	16.3	MP20131205-03	04159704	LC6		2013-12-06 12:14:31	S.dysenteriae/EIEC	32.17	16.2	MP20131206-02	04151544	LC6		2013-12-06 12:14:31	IC MFP3.	31.71	8.2	MP20131206-02	04151544	LC6
	mean	30.814	33.02						mean	32.359	18.47						mean	32.8	17.71						mean	31.842	9.16
																								date	target	cp	fluorescence	plate	barcode	LC
																								2013-11-11 14:55:02	IC MFP4.	30.96	9.2	MP20131111-02	04033245	LC6
																								2013-11-22 13:07:51	IC MFP4.	30.72	9.8	MP20131122-01	04151505	LC6
																								2013-11-25 12:05:33	IC MFP4.	30.37	9	MP20131125-01	04151532	LC6
																								2013-12-04 14:07:56	IC MFP4.	30.26	10.5	MP20131204-02	04159708	LC6
																								2013-12-05 13:55:43	IC MFP4.	30.26	8.9	MP20131205-03	04159704	LC6
																								2013-12-06 12:14:31	IC MFP4.	30.28	9.5	MP20131206-02	04151544	LC6
																								2013-12-09 12:29:13	IC MFP4.	29.13	5.7	MP20131209-01	04159703	LC6
																								2013-12-10 13:16:08	IC MFP4.	29.13	6.1	MP20131210-03	04033819	LC6
																								2013-12-10 15:03:48	IC MFP4.	29.41	7.1	MP20131210-02	04033818	LC6
																								2013-12-18 14:22:41	IC MFP4.	30.35	8.5	MP20131218-02	04151516	LC6
																									mean	30.087	8.43

## Sheet: raw data dye FAM
datum	target	cp	fluor	plaat	barcode	LC	Type	LC
2013-10-07 13:40:56	C.coli	30.45	31.8	MP20131007-01	03948674	LC 6: bij de deur	Type III	LC III
2013-10-15 16:36:31	C.coli	30.48	29.5	MP20131015-11	04033221	LC 6: bij de deur	Type III	LC III
2013-10-16 12:47:20	C.coli	30.61	35.5	MP20131016-03	04033239	LC 6: bij de deur	Type III	LC III
2013-10-23 13:35:04	C.coli	30.2	31.8	MP20131023-03	04033200	LC 6: bij de deur	Type III	LC III
2013-10-27 12:36:46	C.coli	30.44	32.7	MP20131027-02	04033212	LC 6: bij de deur	Type III	LC III
2013-11-11 14:55:02	C.coli	30.24	30.69	MP20131111-02	04033245	LC 6: bij de deur	Type III	LC III
2013-11-22 13:07:51	C.coli	30.13	36.4	MP20131122-01	04151505	LC 6: bij de deur	Type III	LC III
2013-11-25 12:05:33	C.coli	30.45	34.1	MP20131125-01	04151532	LC 6: bij de deur	Type III	LC III
2013-12-04 14:07:56	C.coli	30.1	33.5	MP20131204-02	04159708	LC 6: bij de deur	Type III	LC III
2013-12-05 13:55:43	C.coli	30.12	32.1	MP20131205-03	04159704	LC 6: bij de deur	Type III	LC III
2013-10-07 13:40:56	G.lamblia	31.9	24.6	MP20131007-01	03948674	LC 6: bij de deur	Type III	LC III
2013-10-15 16:36:31	G.lamblia	31.83	25.3	MP20131015-11	04033221	LC 6: bij de deur	Type III	LC III
2013-10-16 12:47:20	G.lamblia	31.94	25.9	MP20131016-03	04033239	LC 6: bij de deur	Type III	LC III
2013-10-23 13:35:04	G.lamblia	31.57	23.8	MP20131023-03	04033200	LC 6: bij de deur	Type III	LC III
2013-10-27 12:36:46	G.lamblia	31.8	26.7	MP20131027-02	04033212	LC 6: bij de deur	Type III	LC III
2013-11-11 14:55:02	G.lamblia	29.94	25	MP20131111-02	04033245	LC 6: bij de deur	Type III	LC III
2013-11-22 13:07:51	G.lamblia	29.96	24.8	MP20131122-01	04151505	LC 6: bij de deur	Type III	LC III
2013-11-25 12:05:33	G.lamblia	30.58	23.7	MP20131125-01	04151532	LC 6: bij de deur	Type III	LC III
2013-12-04 14:07:56	G.lamblia	30.08	22.3	MP20131204-02	04159708	LC 6: bij de deur	Type III	LC III
2013-12-05 13:55:43	G.lamblia	30.19	19.9	MP20131205-03	04159704	LC 6: bij de deur	Type III	LC III
2013-10-07 13:40:56	STEC	30.83	34.6	MP20131007-01	03948674	LC 6: bij de deur	Type III	LC III
2013-10-15 16:36:31	STEC	31.26	36.3	MP20131015-11	04033221	LC 6: bij de deur	Type III	LC III
2013-10-16 12:47:20	STEC	31.12	32.8	MP20131016-03	04033239	LC 6: bij de deur	Type III	LC III
2013-10-23 13:35:04	STEC	29.97	28.4	MP20131023-03	04033200	LC 6: bij de deur	Type III	LC III
2013-10-27 12:36:46	STEC	31.14	40.5	MP20131027-02	04033212	LC 6: bij de deur	Type III	LC III
2013-11-11 14:55:02	STEC	30.95	30.7	MP20131111-02	04033245	LC 6: bij de deur	Type III	LC III
2013-11-22 13:07:51	STEC	30.57	33.2	MP20131122-01	04151505	LC 6: bij de deur	Type III	LC III
2013-11-25 12:05:33	STEC	30.8	34	MP20131125-01	04151532	LC 6: bij de deur	Type III	LC III
2013-12-04 14:07:56	STEC	30.84	32.8	MP20131204-02	04159708	LC 6: bij de deur	Type III	LC III
2013-12-05 13:55:43	STEC	30.66	26.9	MP20131205-03	04159704	LC 6: bij de deur	Type III	LC III
2013-10-02 14:39:25	C.coli	30.42	23.2	MP20131002-03	03948657	LC 4: rechts	Type II	LC II
2013-10-15 13:18:43	C.coli	30.58	21.1	MP20131015-04	03948472	LC 4: rechts	Type II	LC II
2013-10-17 11:51:19	C.coli	30.33	24.5	MP20131017-04	04033236	LC 4: rechts	Type II	LC II
2013-10-22 14:12:13	C.coli	30.53	20.1	MP20131022-06	04033202	LC 4: rechts	Type II	LC II
2013-10-30 15:46:21	C.coli	30.61	24	MP20131030-04	04159737	LC 4: rechts	Type II	LC II
2013-11-04 13:43:14	C.coli	30.93	22.9	MP20131104-03	04159730	LC 4: rechts	Type II	LC II
2013-11-05 12:30:20	C.coli	30.86	23.6	MP20131105-02	04151525	LC 4: rechts	Type II	LC II
2013-11-06 13:42:16	C.coli	30.14	25.92	MP20131106-05	04151522	LC 4: rechts	Type II	LC II
2013-11-08 13:27:51	C.coli	30.04	20.09	MP20131108-01	04033249	LC 4: rechts	Type II	LC II
2013-11-11 13:20:31	C.coli	30.21	18.2	MP20131111-01	04033246	LC 4: rechts	Type II	LC II
2013-10-02 14:39:25	G.lamblia	31.7	18.8	MP20131002-03	03948657	LC 4: rechts	Type II	LC II
2013-10-15 13:18:43	G.lamblia	31.95	16.9	MP20131015-04	03948472	LC 4: rechts	Type II	LC II
2013-10-17 11:51:19	G.lamblia	31.93	18.8	MP20131017-04	04033236	LC 4: rechts	Type II	LC II
2013-10-22 14:12:13	G.lamblia	31.82	17.4	MP20131022-06	04033202	LC 4: rechts	Type II	LC II
2013-10-30 15:46:21	G.lamblia	30.22	15.8	MP20131030-04	04159737	LC 4: rechts	Type II	LC II
2013-11-04 13:43:14	G.lamblia	31.65	19.1	MP20131104-03	04159730	LC 4: rechts	Type II	LC II
2013-11-05 12:30:20	G.lamblia	31.85	17.8	MP20131105-02	04151525	LC 4: rechts	Type II	LC II
2013-11-06 13:42:16	G.lamblia	31.78	18.97	MP20131106-05	04151522	LC 4: rechts	Type II	LC II
2013-11-08 13:27:51	G.lamblia	30.48	19.1	MP20131108-01	04033249	LC 4: rechts	Type II	LC II
2013-11-11 13:20:31	G.lamblia	30.1	18.8	MP20131111-01	04033246	LC 4: rechts	Type II	LC II
2013-10-02 14:39:25	STEC	31.57	20.8	MP20131002-03	03948657	LC 4: rechts	Type II	LC II
2013-10-15 13:18:43	STEC	31.19	16.5	MP20131015-04	03948472	LC 4: rechts	Type II	LC II
2013-10-17 11:51:19	STEC	31.19	23.1	MP20131017-04	04033236	LC 4: rechts	Type II	LC II
2013-10-22 14:12:13	STEC	31.89	19.2	MP20131022-06	04033202	LC 4: rechts	Type II	LC II
2013-10-30 15:46:21	STEC	31.24	18	MP20131030-04	04159737	LC 4: rechts	Type II	LC II
2013-11-04 13:43:14	STEC	31.76	20.5	MP20131104-03	04159730	LC 4: rechts	Type II	LC II
2013-11-05 12:30:20	STEC	31.19	19.3	MP20131105-02	04151525	LC 4: rechts	Type II	LC II
2013-11-06 13:42:16	STEC	31.1	20	MP20131106-05	04151522	LC 4: rechts	Type II	LC II
2013-11-08 13:27:51	STEC	30.71	18.05	MP20131108-01	04033249	LC 4: rechts	Type II	LC II
2013-11-11 13:20:31	STEC	31.23	19.7	MP20131111-01	04033246	LC 4: rechts	Type II	LC II
2013-10-03 13:05:13	G.lamblia	32.02	20.2	MP20131003-02	03948651	LC 1: links	Type I	LC I
2013-10-04 13:58:29	G.lamblia	31.58	18.1	MP20131004-07	03948662	LC 1: links	Type I	LC I
2013-10-09 12:21:52	G.lamblia	31.86	18.7	MP20131009-02	03948680	LC 1: links	Type I	LC I
2013-10-10 12:03:34	G.lamblia	31.84	18.8	MP20131010-02	04034149	LC 1: links	Type I	LC I
2013-10-11 12:14:05	G.lamblia	31.81	20.8	MP20131011-02	04034142	LC 1: links	Type I	LC I
2013-10-14 13:12:30	G.lamblia	31.83	21.4	MP20131014-02	04034102	LC 1: links	Type I	LC I
2013-10-16 13:17:12	G.lamblia	31.75	18.3	MP20131016-04	04033238	LC 1: links	Type I	LC I
2013-10-18 13:41:10	G.lamblia	31.81	19.1	MP20131018-02	04033232	LC 1: links	Type I	LC I
2013-10-21 12:51:51	G.lamblia	31.79	20.2	MP20131021-04	04033217	LC 1: links	Type I	LC I
2013-11-01 14:27:50	G.lamblia	31.73	17.3	MP20131101-03	04151528	LC 1: links	Type I	LC I
2013-10-03 13:05:13	STEC	31.53	24.3	MP20131003-02	03948651	LC 1: links	Type I	LC I
2013-10-04 13:58:29	STEC	31.19	20.6	MP20131004-07	03948662	LC 1: links	Type I	LC I
2013-10-09 12:21:52	STEC	31.24	21.9	MP20131009-02	03948680	LC 1: links	Type I	LC I
2013-10-10 12:03:34	STEC	31.7	25.9	MP20131010-02	04034149	LC 1: links	Type I	LC I
2013-10-11 12:14:05	STEC	31.49	25.1	MP20131011-02	04034142	LC 1: links	Type I	LC I
2013-10-14 13:12:30	STEC	31.05	24.7	MP20131014-02	04034102	LC 1: links	Type I	LC I
2013-10-16 13:17:12	STEC	31.19	27.2	MP20131016-04	04033238	LC 1: links	Type I	LC I
2013-10-18 13:41:10	STEC	30.59	20.1	MP20131018-02	04033232	LC 1: links	Type I	LC I
2013-10-21 12:51:51	STEC	31.2	21.8	MP20131021-04	04033217	LC 1: links	Type I	LC I
2013-10-27 12:13:04	STEC	30.92	26.5	MP20131027-01	04033213	LC 1: links	Type I	LC I
2013-10-03 13:05:13	C.coli	30.09	23.8	MP20131003-02	03948651	LC 1: links	Type I	LC I
2013-10-04 13:58:29	C.coli	30.27	23.3	MP20131004-07	03948662	LC 1: links	Type I	LC I
2013-10-09 12:21:52	C.coli	30.46	25.9	MP20131009-02	03948680	LC 1: links	Type I	LC I
2013-10-10 12:03:34	C.coli	30.59	26.2	MP20131010-02	04034149	LC 1: links	Type I	LC I
2013-10-11 12:14:05	C.coli	30.21	25	MP20131011-02	04034142	LC 1: links	Type I	LC I
2013-10-14 13:12:30	C.coli	30.51	26	MP20131014-02	04034102	LC 1: links	Type I	LC I
2013-10-16 13:17:12	C.coli	30.32	26.2	MP20131016-04	04033238	LC 1: links	Type I	LC I
2013-10-18 13:41:10	C.coli	30.07	25	MP20131018-02	04033232	LC 1: links	Type I	LC I
2013-10-21 12:51:51	C.coli	30.12	20.9	MP20131021-04	04033217	LC 1: links	Type I	LC I
2013-10-27 12:13:04	C.coli	30.27	25.4	MP20131027-01	04033213	LC 1: links	Type I	LC I

## Sheet: raw data dye HEX
datum	target	cp	fluor	plaat	barcode	LC	Type	LC
2013-10-03 13:05:13	D.fragilis	32.01	21.7	MP20131003-02	03948651	LC 1: links	Type I	LC I
2013-10-04 13:58:29	D.fragilis	31.57	20.2	MP20131004-07	03948662	LC 1: links	Type I	LC I
2013-10-09 12:21:52	D.fragilis	32.04	23	MP20131009-02	03948680	LC 1: links	Type I	LC I
2013-10-10 12:03:34	D.fragilis	31.97	18.7	MP20131010-02	04034149	LC 1: links	Type I	LC I
2013-10-11 12:14:05	D.fragilis	31.92	24.4	MP20131011-02	04034142	LC 1: links	Type I	LC I
2013-10-14 13:12:30	D.fragilis	31.9	24.9	MP20131014-02	04034102	LC 1: links	Type I	LC I
2013-10-16 13:17:12	D.fragilis	31.66	22.5	MP20131016-04	04033238	LC 1: links	Type I	LC I
2013-10-18 13:41:10	D.fragilis	31.56	22	MP20131018-02	04033232	LC 1: links	Type I	LC I
2013-10-21 12:51:51	D.fragilis	31.58	21.7	MP20131021-04	04033217	LC 1: links	Type I	LC I
2013-10-27 12:13:04	D.fragilis	31.59	22.7	MP20131027-01	04033213	LC 1: links	Type I	LC I
2013-10-03 13:05:13	Y.enterocolitica	32.79	10.9	MP20131003-02	03948651	LC 1: links	Type I	LC I
2013-10-04 13:58:29	Y.enterocolitica	33.01	10.5	MP20131004-07	03948662	LC 1: links	Type I	LC I
2013-10-09 12:21:52	Y.enterocolitica	32.85	10.8	MP20131009-02	03948680	LC 1: links	Type I	LC I
2013-10-10 12:03:34	Y.enterocolitica	33.57	13.3	MP20131010-02	04034149	LC 1: links	Type I	LC I
2013-10-11 12:14:05	Y.enterocolitica	32.92	11.8	MP20131011-02	04034142	LC 1: links	Type I	LC I
2013-10-14 13:12:30	Y.enterocolitica	32.69	11.9	MP20131014-02	04034102	LC 1: links	Type I	LC I
2013-10-16 13:17:12	Y.enterocolitica	33.03	11.2	MP20131016-04	04033238	LC 1: links	Type I	LC I
2013-10-18 13:41:10	Y.enterocolitica	32.64	11.8	MP20131018-02	04033232	LC 1: links	Type I	LC I
2013-10-21 12:51:51	Y.enterocolitica	32.92	8.9	MP20131021-04	04033217	LC 1: links	Type I	LC I
2013-10-27 12:13:04	Y.enterocolitica	33.07	11.2	MP20131027-01	04033213	LC 1: links	Type I	LC I
2013-10-03 13:05:13	C.jejuni	33.61	26.5	MP20131003-02	03948651	LC 1: links	Type I	LC I
2013-10-04 13:58:29	C.jejuni	33.47	24.8	MP20131004-07	03948662	LC 1: links	Type I	LC I
2013-10-09 12:21:52	C.jejuni	34.05	26.4	MP20131009-02	03948680	LC 1: links	Type I	LC I
2013-10-10 12:03:34	C.jejuni	33.73	26.5	MP20131010-02	04034149	LC 1: links	Type I	LC I
2013-10-11 12:14:05	C.jejuni	33.88	26.7	MP20131011-02	04034142	LC 1: links	Type I	LC I
2013-10-14 13:12:30	C.jejuni	33.6	26.2	MP20131014-02	04034102	LC 1: links	Type I	LC I
2013-10-16 13:17:12	C.jejuni	33.6	27.3	MP20131016-04	04033238	LC 1: links	Type I	LC I
2013-10-18 13:41:10	C.jejuni	33.67	26.7	MP20131018-02	04033232	LC 1: links	Type I	LC I
2013-10-27 12:13:04	C.jejuni	33.63	27.4	MP20131027-01	04033213	LC 1: links	Type I	LC I
2013-11-01 14:27:50	C.jejuni	33.95	26.6	MP20131101-03	04151528	LC 1: links	Type I	LC I
2013-10-02 14:39:25	C.jejuni	33.94	28.2	MP20131002-03	03948657	LC 4: rechts	Type II	LC II
2013-10-15 13:18:43	C.jejuni	33.99	30.3	MP20131015-04	03948472	LC 4: rechts	Type II	LC II
2013-10-17 11:51:19	C.jejuni	33.71	32.6	MP20131017-04	04033236	LC 4: rechts	Type II	LC II
2013-10-22 14:12:13	C.jejuni	33.82	30.3	MP20131022-06	04033202	LC 4: rechts	Type II	LC II
2013-10-30 15:46:21	C.jejuni	33.78	30.6	MP20131030-04	04159737	LC 4: rechts	Type II	LC II
2013-11-04 13:43:14	C.jejuni	34.63	30.6	MP20131104-03	04159730	LC 4: rechts	Type II	LC II
2013-11-05 12:30:20	C.jejuni	34.25	28.5	MP20131105-02	04151525	LC 4: rechts	Type II	LC II
2013-11-06 13:42:16	C.jejuni	33.83	32.87	MP20131106-05	04151522	LC 4: rechts	Type II	LC II
2013-11-08 13:27:51	C.jejuni	33.2	26.41	MP20131108-01	04033249	LC 4: rechts	Type II	LC II
2013-11-13 12:29:35	C.jejuni	33.49	27.2	MP20131113-01	04159719	LC 4: rechts	Type II	LC II
2013-10-02 14:39:25	D.fragilis	31.78	24.7	MP20131002-03	03948657	LC 4: rechts	Type II	LC II
2013-10-15 13:18:43	D.fragilis	31.88	23.2	MP20131015-04	03948472	LC 4: rechts	Type II	LC II
2013-10-17 11:51:19	D.fragilis	31.85	20.6	MP20131017-04	04033236	LC 4: rechts	Type II	LC II
2013-10-22 14:12:13	D.fragilis	31.57	22.3	MP20131022-06	04033202	LC 4: rechts	Type II	LC II
2013-10-30 15:46:21	D.fragilis	29.38	17.4	MP20131030-04	04159737	LC 4: rechts	Type II	LC II
2013-11-04 13:43:14	D.fragilis	31.72	25.2	MP20131104-03	04159730	LC 4: rechts	Type II	LC II
2013-11-05 12:30:20	D.fragilis	32.12	22.2	MP20131105-02	04151525	LC 4: rechts	Type II	LC II
2013-11-06 13:42:16	D.fragilis	31.7	22.37	MP20131106-05	04151522	LC 4: rechts	Type II	LC II
2013-11-08 13:27:51	D.fragilis	30.23	19.71	MP20131108-01	04033249	LC 4: rechts	Type II	LC II
2013-11-11 13:20:31	D.fragilis	29.5	19.87	MP20131111-01	04033246	LC 4: rechts	Type II	LC II
2013-10-02 14:39:25	Y.enterocolitica	32.96	14.1	MP20131002-03	03948657	LC 4: rechts	Type II	LC II
2013-10-15 13:18:43	Y.enterocolitica	32.83	13	MP20131015-04	03948472	LC 4: rechts	Type II	LC II
2013-10-17 11:51:19	Y.enterocolitica	32.79	12.2	MP20131017-04	04033236	LC 4: rechts	Type II	LC II
2013-10-22 14:12:13	Y.enterocolitica	33.22	13	MP20131022-06	04033202	LC 4: rechts	Type II	LC II
2013-10-30 15:46:21	Y.enterocolitica	32.96	13.7	MP20131030-04	04159737	LC 4: rechts	Type II	LC II
2013-11-04 13:43:14	Y.enterocolitica	33.39	12.93	MP20131104-03	04159730	LC 4: rechts	Type II	LC II
2013-11-05 12:30:20	Y.enterocolitica	33.22	12.4	MP20131105-02	04151525	LC 4: rechts	Type II	LC II
2013-11-06 13:42:16	Y.enterocolitica	32.79	13.96	MP20131106-05	04151522	LC 4: rechts	Type II	LC II
2013-11-08 13:27:51	Y.enterocolitica	32.54	11.68	MP20131108-01	04033249	LC 4: rechts	Type II	LC II
2013-11-11 13:20:31	Y.enterocolitica	32.5	11.14	MP20131111-01	04033246	LC 4: rechts	Type II	LC II
2013-10-07 13:40:56	C.jejuni	33.9	39.03	MP20131007-01	03948674	LC 6: bij de deur	Type III	LC III
2013-10-15 16:36:31	C.jejuni	33.9	38.6	MP20131015-11	04033221	LC 6: bij de deur	Type III	LC III
2013-10-16 12:47:20	C.jejuni	33.99	43.3	MP20131016-03	04033239	LC 6: bij de deur	Type III	LC III
2013-10-23 13:35:04	C.jejuni	33.85	41	MP20131023-03	04033200	LC 6: bij de deur	Type III	LC III
2013-10-27 12:36:46	C.jejuni	33.88	40.6	MP20131027-02	04033212	LC 6: bij de deur	Type III	LC III
2013-11-22 13:07:51	C.jejuni	33.59	44	MP20131122-01	04151505	LC 6: bij de deur	Type III	LC III
2013-11-25 12:05:33	C.jejuni	33.45	39.9	MP20131125-01	04151532	LC 6: bij de deur	Type III	LC III
2013-12-04 14:07:56	C.jejuni	33.31	40.5	MP20131204-02	04159708	LC 6: bij de deur	Type III	LC III
2013-12-05 13:55:43	C.jejuni	33.14	42	MP20131205-03	04159704	LC 6: bij de deur	Type III	LC III
2013-12-09 12:29:13	C.jejuni	32.93	39.4	MP20131209-01	04159703	LC 6: bij de deur	Type III	LC III
2013-11-11 14:55:02	D.fragilis	29.09	23.5	MP20131111-02	04033245	LC 6: bij de deur	Type III	LC III
2013-11-22 13:07:51	D.fragilis	29.87	24.2	MP20131122-01	04151505	LC 6: bij de deur	Type III	LC III
2013-11-25 12:05:33	D.fragilis	29.81	26.7	MP20131125-01	04151532	LC 6: bij de deur	Type III	LC III
2013-12-04 14:07:56	D.fragilis	29.76	24.1	MP20131204-02	04159708	LC 6: bij de deur	Type III	LC III
2013-12-05 13:55:43	D.fragilis	29.63	25.3	MP20131205-03	04159704	LC 6: bij de deur	Type III	LC III
2013-12-06 12:14:31	D.fragilis	29.99	24.9	MP20131206-02	04151544	LC 6: bij de deur	Type III	LC III
2013-12-10 15:03:48	D.fragilis	29.13	23.1	MP20131210-02	04033818	LC 6: bij de deur	Type III	LC III
2013-12-18 14:22:41	D.fragilis	29.27	23.2	MP20131218-02	04151516	LC 6: bij de deur	Type III	LC III
2013-12-19 13:47:11	D.fragilis	29.24	24.2	MP20131219-04	04033835	LC 6: bij de deur	Type III	LC III
2013-12-20 13:49:44	D.fragilis	29.83	25	MP20131220-05	04033849	LC 6: bij de deur	Type III	LC III
2013-10-07 13:40:56	Y.enterocolitica	32.62	16.7	MP20131007-01	03948674	LC 6: bij de deur	Type III	LC III
2013-10-15 16:36:31	Y.enterocolitica	32.33	17.2	MP20131015-11	04033221	LC 6: bij de deur	Type III	LC III
2013-10-16 12:47:20	Y.enterocolitica	32.8	18.3	MP20131016-03	04033239	LC 6: bij de deur	Type III	LC III
2013-10-23 13:35:04	Y.enterocolitica	32.91	17.9	MP20131023-03	04033200	LC 6: bij de deur	Type III	LC III
2013-10-27 12:36:46	Y.enterocolitica	32.94	19.2	MP20131027-02	04033212	LC 6: bij de deur	Type III	LC III
2013-11-11 14:55:02	Y.enterocolitica	31.36	26.2	MP20131111-02	04033245	LC 6: bij de deur	Type III	LC III
2013-11-22 13:07:51	Y.enterocolitica	32.04	17.6	MP20131122-01	04151505	LC 6: bij de deur	Type III	LC III
2013-11-25 12:05:33	Y.enterocolitica	32.28	17.5	MP20131125-01	04151532	LC 6: bij de deur	Type III	LC III
2013-12-04 14:07:56	Y.enterocolitica	32.21	17.8	MP20131204-02	04159708	LC 6: bij de deur	Type III	LC III
2013-12-05 13:55:43	Y.enterocolitica	32.1	16.3	MP20131205-03	04159704	LC 6: bij de deur	Type III	LC III

## Sheet: raw data dye RED610
datum	target	cp	fluor	plaat	barcode	LC	Type	LC
2013-10-03 13:05:13	Cryptosporidium spp.	34.82	5	MP20131003-02	03948651	LC 1: links	Type I	LC I
2013-10-04 13:58:29	Cryptosporidium spp.	34.55	4.4	MP20131004-07	03948662	LC 1: links	Type I	LC I
2013-10-09 12:21:52	Cryptosporidium spp.	34.12	4.5	MP20131009-02	03948680	LC 1: links	Type I	LC I
2013-10-10 12:03:34	Cryptosporidium spp.	34.43	4.4	MP20131010-02	04034149	LC 1: links	Type I	LC I
2013-10-11 12:14:05	Cryptosporidium spp.	34.51	5	MP20131011-02	04034142	LC 1: links	Type I	LC I
2013-10-14 13:12:30	Cryptosporidium spp.	34.17	5.1	MP20131014-02	04034102	LC 1: links	Type I	LC I
2013-10-16 13:17:12	Cryptosporidium spp.	34.32	4.9	MP20131016-04	04033238	LC 1: links	Type I	LC I
2013-10-18 13:41:10	Cryptosporidium spp.	34.45	4	MP20131018-02	04033232	LC 1: links	Type I	LC I
2013-10-21 12:51:51	Cryptosporidium spp.	34.59	4.4	MP20131021-04	04033217	LC 1: links	Type I	LC I
2013-11-01 14:27:50	Cryptosporidium spp.	33.71	4.6	MP20131101-03	04151528	LC 1: links	Type I	LC I
2013-10-03 13:05:13	S. enterica	30.83	7.2	MP20131003-02	03948651	LC 1: links	Type I	LC I
2013-10-04 13:58:29	S. enterica	30.95	6	MP20131004-07	03948662	LC 1: links	Type I	LC I
2013-10-09 12:21:52	S. enterica	31.17	6.6	MP20131009-02	03948680	LC 1: links	Type I	LC I
2013-10-10 12:03:34	S. enterica	31.19	6.9	MP20131010-02	04034149	LC 1: links	Type I	LC I
2013-10-11 12:14:05	S. enterica	31.15	7.3	MP20131011-02	04034142	LC 1: links	Type I	LC I
2013-10-14 13:12:30	S. enterica	30.81	7.1	MP20131014-02	04034102	LC 1: links	Type I	LC I
2013-10-18 13:41:10	S. enterica	30.91	7.3	MP20131018-02	04033232	LC 1: links	Type I	LC I
2013-10-21 12:51:51	S. enterica	30.6	6.1	MP20131021-04	04033217	LC 1: links	Type I	LC I
2013-10-27 12:13:04	S. enterica	30.93	7.4	MP20131027-01	04033213	LC 1: links	Type I	LC I
2013-11-01 14:27:50	S. enterica	31.01	6.3	MP20131101-03	04151528	LC 1: links	Type I	LC I
2013-10-03 13:05:13	S.dysenteriae/EIEC	33.61	6.7	MP20131003-02	03948651	LC 1: links	Type I	LC I
2013-10-04 13:58:29	S.dysenteriae/EIEC	33.09	6.1	MP20131004-07	03948662	LC 1: links	Type I	LC I
2013-10-09 12:21:52	S.dysenteriae/EIEC	33.24	7	MP20131009-02	03948680	LC 1: links	Type I	LC I
2013-10-10 12:03:34	S.dysenteriae/EIEC	33.29	6.6	MP20131010-02	04034149	LC 1: links	Type I	LC I
2013-10-11 12:14:05	S.dysenteriae/EIEC	33.91	6.9	MP20131011-02	04034142	LC 1: links	Type I	LC I
2013-10-14 13:12:30	S.dysenteriae/EIEC	34.02	6.9	MP20131014-02	04034102	LC 1: links	Type I	LC I
2013-10-16 13:17:12	S.dysenteriae/EIEC	33.65	6.6	MP20131016-04	04033238	LC 1: links	Type I	LC I
2013-10-18 13:41:10	S.dysenteriae/EIEC	33.44	6.8	MP20131018-02	04033232	LC 1: links	Type I	LC I
2013-10-21 12:51:51	S.dysenteriae/EIEC	33.17	5.9	MP20131021-04	04033217	LC 1: links	Type I	LC I
2013-10-27 12:13:04	S.dysenteriae/EIEC	33.18	6.8	MP20131027-01	04033213	LC 1: links	Type I	LC I
2013-10-02 14:39:25	Cryptosporidium spp.	34.24	8.1	MP20131002-03	03948657	LC 4: rechts	Type II	LC III
2013-10-04 13:13:59	Cryptosporidium spp.	34.15	7.6	MP20131004-01	03948667	LC 4: rechts	Type II	LC II
2013-10-14 13:31:19	Cryptosporidium spp.	34.52	8.3	MP20131014-05	04034100	LC 4: rechts	Type II	LC II
2013-10-15 13:18:43	Cryptosporidium spp.	34.22	7.8	MP20131015-04	03948472	LC 4: rechts	Type II	LC II
2013-10-17 11:51:19	Cryptosporidium spp.	34.96	7.7	MP20131017-04	04033236	LC 4: rechts	Type II	LC II
2013-10-18 13:29:08	Cryptosporidium spp.	34.1	7.9	MP20131018-01	04033233	LC 4: rechts	Type II	LC II
2013-10-22 14:12:13	Cryptosporidium spp.	33.95	8.5	MP20131022-06	04033202	LC 4: rechts	Type II	LC II
2013-11-04 13:43:14	Cryptosporidium spp.	33.63	9.3	MP20131104-03	04159730	LC 4: rechts	Type II	LC II
2013-11-05 12:30:20	Cryptosporidium spp.	34.32	7.9	MP20131105-02	04151525	LC 4: rechts	Type II	LC II
2013-11-06 13:42:16	Cryptosporidium spp.	33.89	8.4	MP20131106-05	04151522	LC 4: rechts	Type II	LC II
2013-10-02 14:39:25	S. enterica	31.31	11.2	MP20131002-03	03948657	LC 4: rechts	Type II	LC II
2013-10-15 13:18:43	S. enterica	31.46	13.3	MP20131015-04	03948472	LC 4: rechts	Type II	LC II
2013-10-17 11:51:19	S. enterica	30.83	12.6	MP20131017-04	04033236	LC 4: rechts	Type II	LC II
2013-10-22 14:12:13	S. enterica	30.97	12.5	MP20131022-06	04033202	LC 4: rechts	Type II	LC II
2013-10-30 15:46:21	S. enterica	30.82	12.5	MP20131030-04	04159737	LC 4: rechts	Type II	LC II
2013-11-04 13:43:14	S. enterica	31.65	12.9	MP20131104-03	04159730	LC 4: rechts	Type II	LC II
2013-11-05 12:30:20	S. enterica	32.03	10.1	MP20131105-02	04151525	LC 4: rechts	Type II	LC II
2013-11-06 13:42:16	S. enterica	31.1	14.1	MP20131106-05	04151522	LC 4: rechts	Type II	LC II
2013-11-08 13:27:51	S. enterica	30.92	9.9	MP20131108-01	04033249	LC 4: rechts	Type II	LC II
2013-11-11 13:20:31	S. enterica	30.69	12.54	MP20131111-01	04033246	LC 4: rechts	Type II	LC II
2013-10-02 14:39:25	S.dysenteriae/EIEC	33.47	10.6	MP20131002-03	03948657	LC 4: rechts	Type II	LC II
2013-10-15 13:18:43	S.dysenteriae/EIEC	33.78	11.7	MP20131015-04	03948472	LC 4: rechts	Type II	LC II
2013-10-17 11:51:19	S.dysenteriae/EIEC	33.57	11.8	MP20131017-04	04033236	LC 4: rechts	Type II	LC II
2013-10-22 14:12:13	S.dysenteriae/EIEC	33.1	10.9	MP20131022-06	04033202	LC 4: rechts	Type II	LC II
2013-11-04 13:43:14	S.dysenteriae/EIEC	33.5	10.3	MP20131104-03	04159730	LC 4: rechts	Type II	LC II
2013-11-05 12:30:20	S.dysenteriae/EIEC	34.07	10.1	MP20131105-02	04151525	LC 4: rechts	Type II	LC II
2013-11-06 13:42:16	S.dysenteriae/EIEC	33.45	11.08	MP20131106-05	04151522	LC 4: rechts	Type II	LC II
2013-11-08 13:27:51	S.dysenteriae/EIEC	33.68	8.7	MP20131108-01	04033249	LC 4: rechts	Type II	LC II
2013-11-11 13:20:31	S.dysenteriae/EIEC	33.89	9.4	MP20131111-01	04033246	LC 4: rechts	Type II	LC II
2013-11-13 12:29:35	S.dysenteriae/EIEC	33.3	8.5	MP20131113-01	04159719	LC 4: rechts	Type II	LC II
2013-10-07 13:40:56	Cryptosporidium spp.	33.95	13.1	MP20131007-01	03948674	LC 6: bij de deur	Type III	LC III
2013-10-15 16:36:31	Cryptosporidium spp.	33.89	14.1	MP20131015-11	04033221	LC 6: bij de deur	Type III	LC III
2013-10-16 12:47:20	Cryptosporidium spp.	33.74	13.7	MP20131016-03	04033239	LC 6: bij de deur	Type III	LC III
2013-10-23 13:35:04	Cryptosporidium spp.	34.18	12.4	MP20131023-03	04033200	LC 6: bij de deur	Type III	LC III
2013-10-27 12:36:46	Cryptosporidium spp.	34.16	14	MP20131027-02	04033212	LC 6: bij de deur	Type III	LC III
2013-11-22 13:07:51	Cryptosporidium spp.	29.1	11.6	MP20131122-01	04151505	LC 6: bij de deur	Type III	LC III
2013-11-25 12:05:33	Cryptosporidium spp.	29.02	11.2	MP20131125-01	04151532	LC 6: bij de deur	Type III	LC III
2013-12-04 14:07:56	Cryptosporidium spp.	29.01	11.4	MP20131204-02	04159708	LC 6: bij de deur	Type III	LC III
2013-12-05 13:55:43	Cryptosporidium spp.	28.75	10.9	MP20131205-03	04159704	LC 6: bij de deur	Type III	LC III
2013-12-06 12:14:31	Cryptosporidium spp.	29.15	11.6	MP20131206-02	04151544	LC 6: bij de deur	Type III	LC III
2013-10-07 13:40:56	S. enterica	31.04	20.68	MP20131007-01	03948674	LC 6: bij de deur	Type III	LC III
2013-10-15 16:36:31	S. enterica	31.24	17.7	MP20131015-11	04033221	LC 6: bij de deur	Type III	LC III
2013-10-16 12:47:20	S. enterica	31.06	21	MP20131016-03	04033239	LC 6: bij de deur	Type III	LC III
2013-10-23 13:35:04	S. enterica	31.26	20.7	MP20131023-03	04033200	LC 6: bij de deur	Type III	LC III
2013-10-27 12:36:46	S. enterica	30.93	19.1	MP20131027-02	04033212	LC 6: bij de deur	Type III	LC III
2013-11-11 14:55:02	S. enterica	30.57	22.7	MP20131111-02	04033245	LC 6: bij de deur	Type III	LC III
2013-11-22 13:07:51	S. enterica	30.5	15.2	MP20131122-01	04151505	LC 6: bij de deur	Type III	LC III
2013-11-25 12:05:33	S. enterica	30.31	15.1	MP20131125-01	04151532	LC 6: bij de deur	Type III	LC III
2013-12-04 14:07:56	S. enterica	30.73	17	MP20131204-02	04159708	LC 6: bij de deur	Type III	LC III
2013-12-05 13:55:43	S. enterica	30.77	14.6	MP20131205-03	04159704	LC 6: bij de deur	Type III	LC III
2013-10-07 13:40:56	S.dysenteriae/EIEC	33.56	16.8	MP20131007-01	03948674	LC 6: bij de deur	Type III	LC III
2013-10-15 16:36:31	S.dysenteriae/EIEC	33.1	19.1	MP20131015-11	04033221	LC 6: bij de deur	Type III	LC III
2013-10-16 12:47:20	S.dysenteriae/EIEC	33.49	20	MP20131016-03	04033239	LC 6: bij de deur	Type III	LC III
2013-10-23 13:35:04	S.dysenteriae/EIEC	32.32	17.6	MP20131023-03	04033200	LC 6: bij de deur	Type III	LC III
2013-10-27 12:36:46	S.dysenteriae/EIEC	33.41	19.4	MP20131027-02	04033212	LC 6: bij de deur	Type III	LC III
2013-11-11 14:55:02	S.dysenteriae/EIEC	33.2	18.3	MP20131111-02	04033245	LC 6: bij de deur	Type III	LC III
2013-11-25 12:05:33	S.dysenteriae/EIEC	32.02	17.9	MP20131125-01	04151532	LC 6: bij de deur	Type III	LC III
2013-12-04 14:07:56	S.dysenteriae/EIEC	32.46	16.5	MP20131204-02	04159708	LC 6: bij de deur	Type III	LC III
2013-12-05 13:55:43	S.dysenteriae/EIEC	32.27	15.3	MP20131205-03	04159704	LC 6: bij de deur	Type III	LC III
2013-12-06 12:14:31	S.dysenteriae/EIEC	32.17	16.2	MP20131206-02	04151544	LC 6: bij de deur	Type III	LC III

## Sheet: raw data dye Cy5
datum	target	cp	fluor	plaat	barcode	LC	Type	LC
2013-10-03 13:05:13	IC MFP3	32.04	1.6	MP20131003-02	03948651	LC 1: links	Type I	LC I
2013-10-04 13:58:29	IC MFP3	31.83	1.5	MP20131004-07	03948662	LC 1: links	Type I	LC I
2013-10-09 12:21:52	IC MFP3	32.43	1.4	MP20131009-02	03948680	LC 1: links	Type I	LC I
2013-10-10 12:03:34	IC MFP3	32.07	1.6	MP20131010-02	04034149	LC 1: links	Type I	LC I
2013-10-11 12:14:05	IC MFP3	32.19	1.6	MP20131011-02	04034142	LC 1: links	Type I	LC I
2013-10-14 13:12:30	IC MFP3	32.46	1.7	MP20131014-02	04034102	LC 1: links	Type I	LC I
2013-10-16 13:17:12	IC MFP3	31.75	1.7	MP20131016-04	04033238	LC 1: links	Type I	LC I
2013-10-18 13:41:10	IC MFP3	31.73	1.4	MP20131018-02	04033232	LC 1: links	Type I	LC I
2013-10-21 12:51:51	IC MFP3	31.87	1.6	MP20131021-04	04033217	LC 1: links	Type I	LC I
2013-11-01 14:27:50	IC MFP3	32.2	1.7	MP20131101-03	04151528	LC 1: links	Type I	LC I
2013-10-03 13:05:13	IC MFP4	32.09	1.6	MP20131003-02	03948651	LC 1: links	Type I	LC I
2013-10-04 13:58:29	IC MFP4	32.26	1.5	MP20131004-07	03948662	LC 1: links	Type I	LC I
2013-10-09 12:21:52	IC MFP4	32.46	1.7	MP20131009-02	03948680	LC 1: links	Type I	LC I
2013-10-10 12:03:34	IC MFP4	32.18	1.7	MP20131010-02	04034149	LC 1: links	Type I	LC I
2013-10-11 12:14:05	IC MFP4	32.08	1.6	MP20131011-02	04034142	LC 1: links	Type I	LC I
2013-10-14 13:12:30	IC MFP4	32.42	1.8	MP20131014-02	04034102	LC 1: links	Type I	LC I
2013-10-16 13:17:12	IC MFP4	32.27	1.8	MP20131016-04	04033238	LC 1: links	Type I	LC I
2013-10-18 13:41:10	IC MFP4	32.11	1.7	MP20131018-02	04033232	LC 1: links	Type I	LC I
2013-10-21 12:51:51	IC MFP4	32.18	1.9	MP20131021-04	04033217	LC 1: links	Type I	LC I
2013-11-01 14:27:50	IC MFP4	32.48	1.7	MP20131101-03	04151528	LC 1: links	Type I	LC I
2013-10-27 12:13:04	IC MFP1	31.93	1.6	MP20131027-01	04033213	LC 1: links	Type I	LC I
2013-10-04 13:58:29	IC MFP1	31.83	1.5	MP20131004-07	03948662	LC 1: links	Type I	LC I
2013-10-09 12:21:52	IC MFP1	32.33	1.7	MP20131009-02	03948680	LC 1: links	Type I	LC I
2013-10-03 13:05:13	IC MFP1	32.52	1.5	MP20131003-02	03948651	LC 1: links	Type I	LC I
2013-10-18 13:41:10	IC MFP1	32.17	1.5	MP20131018-02	04033232	LC 1: links	Type I	LC I
2013-10-10 12:03:34	IC MFP1	32.15	1.5	MP20131010-02	04034149	LC 1: links	Type I	LC I
2013-10-21 12:51:51	IC MFP1	31.8	1.4	MP20131021-04	04033217	LC 1: links	Type I	LC I
2013-10-11 12:14:05	IC MFP1	32.23	1.5	MP20131011-02	04034142	LC 1: links	Type I	LC I
2013-10-14 13:12:30	IC MFP1	32.42	1.6	MP20131014-02	04034102	LC 1: links	Type I	LC I
2013-10-16 13:17:12	IC MFP1	32.15	1.6	MP20131016-04	04033238	LC 1: links	Type I	LC I
2013-10-03 13:05:13	IC MFP2	32.16	1.4	MP20131003-02	03948651	LC 1: links	Type I	LC I
2013-10-04 13:58:29	IC MFP2	32.1	1.3	MP20131004-07	03948662	LC 1: links	Type I	LC I
2013-10-09 12:21:52	IC MFP2	32.48	1.4	MP20131009-02	03948680	LC 1: links	Type I	LC I
2013-10-10 12:03:34	IC MFP2	32.13	1.5	MP20131010-02	04034149	LC 1: links	Type I	LC I
2013-10-11 12:14:05	IC MFP2	32.2	1.5	MP20131011-02	04034142	LC 1: links	Type I	LC I
2013-10-14 13:12:30	IC MFP2	32.46	1.5	MP20131014-02	04034102	LC 1: links	Type I	LC I
2013-10-16 13:17:12	IC MFP2	32.04	1.4	MP20131016-04	04033238	LC 1: links	Type I	LC I
2013-10-18 13:41:10	IC MFP2	32.24	1.5	MP20131018-02	04033232	LC 1: links	Type I	LC I
2013-10-21 12:51:51	IC MFP2	31.71	1	MP20131021-04	04033217	LC 1: links	Type I	LC I
2013-10-27 12:13:04	IC MFP2	31.92	1.6	MP20131027-01	04033213	LC 1: links	Type I	LC I
2013-10-02 14:39:25	IC MFP1	32.32	6.5	MP20131002-03	03948657	LC 4: rechts	Type II	LC II
2013-10-15 13:18:43	IC MFP1	32.56	6	MP20131015-04	03948472	LC 4: rechts	Type II	LC II
2013-10-17 11:51:19	IC MFP1	32.02	6.4	MP20131017-04	04033236	LC 4: rechts	Type II	LC II
2013-10-22 14:12:13	IC MFP1	32.2	6.4	MP20131022-06	04033202	LC 4: rechts	Type II	LC II
2013-10-30 15:46:21	IC MFP1	32.14	6.8	MP20131030-04	04159737	LC 4: rechts	Type II	LC II
2013-11-04 13:43:14	IC MFP1	32.74	7	MP20131104-03	04159730	LC 4: rechts	Type II	LC II
2013-11-05 12:30:20	IC MFP1	32.27	6.5	MP20131105-02	04151525	LC 4: rechts	Type II	LC II
2013-11-06 13:42:16	IC MFP1	32.59	6.1	MP20131106-05	04151522	LC 4: rechts	Type II	LC II
2013-11-08 13:27:51	IC MFP1	32.68	6	MP20131108-01	04033249	LC 4: rechts	Type II	LC II
2013-11-13 12:29:35	IC MFP1	32.52	6.1	MP20131113-01	04159719	LC 4: rechts	Type II	LC II
2013-10-02 14:39:25	IC MFP2	32.46	6.1	MP20131002-03	03948657	LC 4: rechts	Type II	LC II
2013-10-15 13:18:43	IC MFP2	32.54	6.2	MP20131015-04	03948472	LC 4: rechts	Type II	LC II
2013-10-17 11:51:19	IC MFP2	32.07	6.1	MP20131017-04	04033236	LC 4: rechts	Type II	LC II
2013-10-22 14:12:13	IC MFP2	32.2	5.6	MP20131022-06	04033202	LC 4: rechts	Type II	LC II
2013-10-30 15:46:21	IC MFP2	32.27	6.6	MP20131030-04	04159737	LC 4: rechts	Type II	LC II
2013-11-04 13:43:14	IC MFP2	32.72	6.3	MP20131104-03	04159730	LC 4: rechts	Type II	LC II
2013-11-06 13:42:16	IC MFP2	32.59	6.3	MP20131106-05	04151522	LC 4: rechts	Type II	LC II
2013-11-08 13:27:51	IC MFP2	32.56	6.4	MP20131108-01	04033249	LC 4: rechts	Type II	LC II
2013-11-11 13:20:31	IC MFP2	32.59	6.3	MP20131111-01	04033246	LC 4: rechts	Type II	LC II
2013-11-13 12:29:35	IC MFP2	32.44	6.3	MP20131113-01	04159719	LC 4: rechts	Type II	LC II
2013-10-02 14:39:25	IC MFP3	32.27	6.5	MP20131002-03	03948657	LC 4: rechts	Type II	LC II
2013-10-15 13:18:43	IC MFP3	32.45	5.9	MP20131015-04	03948472	LC 4: rechts	Type II	LC II
2013-10-17 11:51:19	IC MFP3	31.66	6.1	MP20131017-04	04033236	LC 4: rechts	Type II	LC II
2013-10-22 14:12:13	IC MFP3	32.21	5.8	MP20131022-06	04033202	LC 4: rechts	Type II	LC II
2013-10-30 15:46:21	IC MFP3	32.15	5.8	MP20131030-04	04159737	LC 4: rechts	Type II	LC II
2013-11-04 13:43:14	IC MFP3	32.77	6.5	MP20131104-03	04159730	LC 4: rechts	Type II	LC II
2013-11-05 12:30:20	IC MFP3	32.14	5.6	MP20131105-02	04151525	LC 4: rechts	Type II	LC II
2013-11-06 13:42:16	IC MFP3	32.72	5.7	MP20131106-05	04151522	LC 4: rechts	Type II	LC II
2013-11-08 13:27:51	IC MFP3	32.03	6.5	MP20131108-01	04033249	LC 4: rechts	Type II	LC II
2013-11-11 13:20:31	IC MFP3	31.82	6.3	MP20131111-01	04033246	LC 4: rechts	Type II	LC II
2013-10-02 14:39:25	IC MFP4	32.12	6.9	MP20131002-03	03948657	LC 4: rechts	Type II	LC II
2013-10-15 13:18:43	IC MFP4	32.57	7.4	MP20131015-04	03948472	LC 4: rechts	Type II	LC II
2013-10-17 11:51:19	IC MFP4	32.11	6.5	MP20131017-04	04033236	LC 4: rechts	Type II	LC II
2013-10-22 14:12:13	IC MFP4	32.23	7	MP20131022-06	04033202	LC 4: rechts	Type II	LC II
2013-10-30 15:46:21	IC MFP4	30.53	7.3	MP20131030-04	04159737	LC 4: rechts	Type II	LC II
2013-11-04 13:43:14	IC MFP4	32.58	6.9	MP20131104-03	04159730	LC 4: rechts	Type II	LC II
2013-11-05 12:30:20	IC MFP4	32.67	6.2	MP20131105-02	04151525	LC 4: rechts	Type II	LC II
2013-11-06 13:42:16	IC MFP4	32.8	6.9	MP20131106-05	04151522	LC 4: rechts	Type II	LC II
2013-11-08 13:27:51	IC MFP4	31.07	7.1	MP20131108-01	04033249	LC 4: rechts	Type II	LC II
2013-11-11 13:20:31	IC MFP4	30.99	7.6	MP20131111-01	04033246	LC 4: rechts	Type II	LC II
2013-10-07 13:40:56	IC MFP1	32.25	8.2	MP20131007-01	03948674	LC 6: bij de deur	Type III	LC III
2013-10-15 16:36:31	IC MFP1	32.46	8.5	MP20131015-11	04033221	LC 6: bij de deur	Type III	LC III
2013-10-16 12:47:20	IC MFP1	32.23	8.9	MP20131016-03	04033239	LC 6: bij de deur	Type III	LC III
2013-10-23 13:35:04	IC MFP1	32.46	8.4	MP20131023-03	04033200	LC 6: bij de deur	Type III	LC III
2013-10-27 12:36:46	IC MFP1	32.2	8.6	MP20131027-02	04033212	LC 6: bij de deur	Type III	LC III
2013-11-11 14:55:02	IC MFP1	32.11	10.6	MP20131111-02	04033245	LC 6: bij de deur	Type III	LC III
2013-11-22 13:07:51	IC MFP1	31.96	8.9	MP20131122-01	04151505	LC 6: bij de deur	Type III	LC III
2013-11-25 12:05:33	IC MFP1	32.27	8.5	MP20131125-01	04151532	LC 6: bij de deur	Type III	LC III
2013-12-04 14:07:56	IC MFP1	31.9	9.1	MP20131204-02	04159708	LC 6: bij de deur	Type III	LC III
2013-12-05 13:55:43	IC MFP1	31.9	9	MP20131205-03	04159704	LC 6: bij de deur	Type III	LC III
2013-10-07 13:40:56	IC MFP2	32.25	7.8	MP20131007-01	03948674	LC 6: bij de deur	Type III	LC III
2013-10-15 16:36:31	IC MFP2	32.46	7.6	MP20131015-11	04033221	LC 6: bij de deur	Type III	LC III
2013-10-16 12:47:20	IC MFP2	32.06	8.8	MP20131016-03	04033239	LC 6: bij de deur	Type III	LC III
2013-10-23 13:35:04	IC MFP2	32.25	8.7	MP20131023-03	04033200	LC 6: bij de deur	Type III	LC III
2013-10-27 12:36:46	IC MFP2	32.24	9.2	MP20131027-02	04033212	LC 6: bij de deur	Type III	LC III
2013-11-11 14:55:02	IC MFP2	32.27	11.3	MP20131111-02	04033245	LC 6: bij de deur	Type III	LC III
2013-11-22 13:07:51	IC MFP2	31.85	9.4	MP20131122-01	04151505	LC 6: bij de deur	Type III	LC III
2013-11-25 12:05:33	IC MFP2	32	9.7	MP20131125-01	04151532	LC 6: bij de deur	Type III	LC III
2013-12-04 14:07:56	IC MFP2	31.71	9.6	MP20131204-02	04159708	LC 6: bij de deur	Type III	LC III
2013-12-05 13:55:43	IC MFP2	32.03	9.4	MP20131205-03	04159704	LC 6: bij de deur	Type III	LC III
2013-10-07 13:40:56	IC MFP3	32.45	9.1	MP20131007-01	03948674	LC 6: bij de deur	Type III	LC III
2013-10-15 16:36:31	IC MFP3	32.16	9.9	MP20131015-11	04033221	LC 6: bij de deur	Type III	LC III
2013-10-16 12:47:20	IC MFP3	32.02	9.6	MP20131016-03	04033239	LC 6: bij de deur	Type III	LC III
2013-10-27 12:36:46	IC MFP3	32.22	11.5	MP20131027-02	04033212	LC 6: bij de deur	Type III	LC III
2013-11-11 14:55:02	IC MFP3	31.7	8.5	MP20131111-02	04033245	LC 6: bij de deur	Type III	LC III
2013-11-22 13:07:51	IC MFP3	31.62	9.3	MP20131122-01	04151505	LC 6: bij de deur	Type III	LC III
2013-11-25 12:05:33	IC MFP3	31.7	8.5	MP20131125-01	04151532	LC 6: bij de deur	Type III	LC III
2013-12-04 14:07:56	IC MFP3	31.6	9.3	MP20131204-02	04159708	LC 6: bij de deur	Type III	LC III
2013-12-05 13:55:43	IC MFP3	31.24	7.7	MP20131205-03	04159704	LC 6: bij de deur	Type III	LC III
2013-12-06 12:14:31	IC MFP3	31.71	8.2	MP20131206-02	04151544	LC 6: bij de deur	Type III	LC III
2013-11-11 14:55:02	IC MFP4	30.96	9.2	MP20131111-02	04033245	LC 6: bij de deur	Type III	LC III
2013-11-22 13:07:51	IC MFP4	30.72	9.8	MP20131122-01	04151505	LC 6: bij de deur	Type III	LC III
2013-11-25 12:05:33	IC MFP4	30.37	9	MP20131125-01	04151532	LC 6: bij de deur	Type III	LC III
2013-12-04 14:07:56	IC MFP4	30.26	10.5	MP20131204-02	04159708	LC 6: bij de deur	Type III	LC III
2013-12-05 13:55:43	IC MFP4	30.26	8.9	MP20131205-03	04159704	LC 6: bij de deur	Type III	LC III
2013-12-06 12:14:31	IC MFP4	30.28	9.5	MP20131206-02	04151544	LC 6: bij de deur	Type III	LC III
2013-12-09 12:29:13	IC MFP4	29.13	5.7	MP20131209-01	04159703	LC 6: bij de deur	Type III	LC III
2013-12-10 13:16:08	IC MFP4	29.13	6.1	MP20131210-03	04033819	LC 6: bij de deur	Type III	LC III
2013-12-10 15:03:48	IC MFP4	29.41	7.1	MP20131210-02	04033818	LC 6: bij de deur	Type III	LC III
2013-12-18 14:22:41	IC MFP4	30.35	8.5	MP20131218-02	04151516	LC 6: bij de deur	Type III	LC III

## Sheet: figure 1
		Mean of ten analysis
okt/nov		level of fluorescence					Cq value
		Type I	Type II	Type III			Type I	Type II	Type III
		LC I	LC II	LC III			LC I	LC II	LC III
Fam	C.coli	24.77	22.361	32.809			30.291	30.465	30.322
	STEC	23.81	19.515	33.02			31.21	31.307	30.814
	G.lamblia	19.29	18.147	24.2			31.802	31.348	30.979
okt/nov		level of fluorescence					Cq value
		Type I	Type II	Type III			Type I	Type II	Type III
		LC I	LC II	LC III			LC I	LC II	LC III
hex	C.jejuni	26.51	29.758	40.833			33.719	33.864	33.594
	Y.enterocolitica	11.23	12.811	18.47			32.949	32.92	32.359
	D.fragilis	22.18	21.755	24.42			31.78	31.173	29.562
okt/nov		level of fluorescence					Cq value
		Type I	Type II	Type III			Type I	Type II	Type III
		LC I	LC II	LC III			LC I	LC II	LC III
Red 610	S.enterica	6.82	12.164	18.378			30.955	31.178	30.841
	S.dysenteriae/EIEC	6.63	10.308	17.71			33.46	33.581	32.8
	Cryptosporidium spp.	4.63	8.15	12.4			34.367	34.198	31.495
okt/nov		level of fluorescence					Cq value
		Type I	Type II	Type III			Type I	Type II	Type III
		LC I-A	LC II-C	LC III-E			LC I	LC II	LC III
cy5	IC MFP1	1.54	6.38	8.87			32.153	32.404	32.174
	IC MFP2	1.41	6.22	9.15			32.144	32.444	32.112
	IC MFP3	1.58	6.07	9.16			32.057	32.222	31.842
	IC MFP4	1.7	6.98	8.43			32.253	31.967	30.087

## Sheet: Table 4.mean and std. Deviation
* Encoding: UTF-8.
GET DATA
/TYPE=XLSX
/FILE='D:\data statistical analyses_MV.xlsx'
/SHEET=name 'LC1'
/CELLRANGE=FULL
/READNAMES=ON
/DATATYPEMIN PERCENTAGE=95.0
/HIDDEN IGNORE=YES.
EXECUTE.
DATASET NAME DataSet1 WINDOW=FRONT.
FREQUENCIES VARIABLES=target
/ORDER=ANALYSIS.
Frequencies - LC1
Statistics
target			cp	fluor
Camp-coli	N	Valid	10	10
		Missing	0	0
	Mean		30.291	24.77
	Std. Deviation		0.180336	1.68196
Camp-jeju	N	Valid	10	10
		Missing	0	0
	Mean		33.719	26.51
	Std. Deviation		0.183027	0.709382
Crypto	N	Valid	10	10
		Missing	0	0
	Mean		34.367	4.63
	Std. Deviation		0.307934	0.356059
Cyano-MFP1	N	Valid	10	10
		Missing	0	0
	Mean		32.153	1.54
	Std. Deviation		0.24088	0.0843274
Cyano-MFP2	N	Valid	10	10
		Missing	0	0
	Mean		32.144	1.41
	Std. Deviation		0.230179	0.166333
cyano-MFP3	N	Valid	10	10
		Missing	0	0
	Mean		32.057	1.58
	Std. Deviation		0.264115	0.113529
Cyano-MFP4	N	Valid	10	10
		Missing	0	0
	Mean		32.253	1.7
	Std. Deviation		0.152829	0.11547
Dienta	N	Valid	10	10
		Missing	0	0
	Mean		31.78	22.18
	Std. Deviation		0.203743	1.82257
Giardia	N	Valid	10	10
		Missing	0	0
	Mean		31.802	19.29
	Std. Deviation		0.110835	1.30678
Salmonella	N	Valid	10	10
		Missing	0	0
	Mean		30.955	6.82
	Std. Deviation		0.184947	0.530827
Shigella	N	Valid	10	10
		Missing	0	0
	Mean		33.46	6.63
	Std. Deviation		0.325201	0.359166
STEC	N	Valid	10	10
		Missing	0	0
	Mean		31.21	23.81
	Std. Deviation		0.319166	2.5287
Yersinia	N	Valid	10	10
		Missing	0	0
	Mean		32.949	11.23
	Std. Deviation		0.260318	1.1373
GET DATA
/TYPE=XLSX
/FILE='D:\data statistical analyses_MV.xlsx'
/SHEET=name 'LC4'
/CELLRANGE=FULL
/READNAMES=ON
/DATATYPEMIN PERCENTAGE=95.0
/HIDDEN IGNORE=YES.
EXECUTE.
DATASET NAME DataSet1 WINDOW=FRONT.
Frequencies - LC4
Statistics
target			cp	fluor
Camp-coli	N	Valid	10	10
		Missing	0	0
	Mean		30.465	22.361
	Std. Deviation		0.294816	2.39516
Camp-jeju	N	Valid	10	10
		Missing	0	0
	Mean		33.864	29.758
	Std. Deviation		0.390447	2.14811
Crypto	N	Valid	10	10
		Missing	0	0
	Mean		34.198	8.15
	Std. Deviation		0.363984	0.503874
Cyano-MFP1	N	Valid	10	10
		Missing	0	0
	Mean		32.404	6.38
	Std. Deviation		0.246135	0.33928
Cyano-MFP2	N	Valid	10	10
		Missing	0	0
	Mean		32.444	6.22
	Std. Deviation		0.203153	0.261619
Cyano-MFP3	N	Valid	10	10
		Missing	0	0
	Mean		32.222	6.07
	Std. Deviation		0.354175	0.356059
Cyano-MFP4	N	Valid	10	10
		Missing	0	0
	Mean		31.967	6.98
	Std. Deviation		0.807232	0.413118
Dienta	N	Valid	10	10
		Missing	0	0
	Mean		31.173	21.755
	Std. Deviation		1.04674	2.39299
Giardia	N	Valid	10	10
		Missing	0	0
	Mean		31.348	18.147
	Std. Deviation		0.757258	1.13112
Salmonella	N	Valid	10	10
		Missing	0	0
	Mean		31.178	12.164
	Std. Deviation		0.428039	1.35206
Shigella	N	Valid	10	10
		Missing	0	0
	Mean		33.581	10.308
	Std. Deviation		0.284896	1.15074
STEC	N	Valid	10	10
		Missing	0	0
	Mean		31.307	19.515
	Std. Deviation		0.343998	1.80801
Yersinia	N	Valid	10	10
		Missing	0	0
	Mean		32.92	12.811
	Std. Deviation		0.29189	0.970183
GET DATA
/TYPE=XLSX
/FILE='D:\data statistical analyses_MV.xlsx'
/SHEET=name 'LC6'
/CELLRANGE=FULL
/READNAMES=ON
/DATATYPEMIN PERCENTAGE=95.0
/HIDDEN IGNORE=YES.
EXECUTE.
DATASET NAME DataSet1 WINDOW=FRONT.
Frequencies - LC6
Statistics
target			cp	fluor
Camp-coli	N	Valid	10	10
		Missing	0	0
	Mean		30.322	32.809
	Std. Deviation		0.183533	2.11532
Camp-jeju	N	Valid	10	10
		Missing	0	0
	Mean		33.594	40.833
	Std. Deviation		0.37116	1.78985
Crypto	N	Valid	10	10
		Missing	0	0
	Mean		31.495	12.4
	Std. Deviation		2.62859	1.22927
Cyano-MFP1	N	Valid	10	10
		Missing	0	0
	Mean		32.174	8.87
	Std. Deviation		0.206139	0.673383
Cyano-MFP2	N	Valid	10	10
		Missing	0	0
	Mean		32.112	9.15
	Std. Deviation		0.224291	1.04376
Cyano-MFP3	N	Valid	10	10
		Missing	0	0
	Mean		31.842	9.16
	Std. Deviation		0.361072	1.06375
Cyano-MFP4	N	Valid	10	10
		Missing	0	0
	Mean		30.087	8.43
	Std. Deviation		0.641111	1.60212
Dienta	N	Valid	10	10
		Missing	0	0
	Mean		29.562	24.42
	Std. Deviation		0.342144	1.09626
Giardia	N	Valid	10	10
		Missing	0	0
	Mean		30.979	24.2
	Std. Deviation		0.896108	1.94422
Salmonella	N	Valid	10	10
		Missing	0	0
	Mean		30.841	18.378
	Std. Deviation		0.319599	2.87216
Shigella	N	Valid	10	10
		Missing	0	0
	Mean		32.8	17.71
	Std. Deviation		0.606264	1.52056
STEC	N	Valid	10	10
		Missing	0	0
	Mean		30.814	33.02
	Std. Deviation		0.367278	3.86546
Yersinia	N	Valid	10	10
		Missing	0	0
	Mean		32.359	18.47
	Std. Deviation		0.483033	2.83316
