# Supplementary material for: Variability and cost implications of three generations of the Roche LightCycler® 480
Source: PLoS One. 2018 Jan 12;13(1):e0190847. doi: 10.1371/journal.pone.0190847 (PMC5766094; doi:10.1371/journal.pone.0190847)
Supplement: S4 Dataset — (XLSX) [file pone.0190847.s004.xlsx]

## Sheet: lamp changing
		data januari 2014
		data oktober 2013						after changing lampunit LC1 and LC4				after changing lampunit LC2
		LC						Fluorescence test 1				Fluorescence test 2				these tables show the trend
		fluorescence value is fluctuating
		LC1*	LC2*	LC4	LC5	LC6			LC1	LC2	LC4			LC1 (2)	LC2 (2)	LC4 (2)				okt.LC			in jan. fluorescence lower than in okt.				after changing lampunit			in time
	Cjej jan 2014	17	19	30	30	35	Cjej	not diluted	23.342	15.302	20.209	Cjej	not diluted	24.451	16.5745	29.1935				LC1 voor	LC2 voor	LC4 voor	LC1 voor	LC2 voor	LC4 voor	LC1 na	LC2 na	LC4 na	LC1 tijd	LC4 tijd
	1	27	16	24	29	39		10^1	22.803	13.9585	21.3375		10^1	22.8475	15.9495	26.603		hex	Cjej	27	14.5	27.5	17	15.302	30	23.342	16.5745	20.209	24.451	29.1935
	2	27	13	31	30	42		10^2	20.7895	13.1785	21.215		10^2	15.268	12.723	19.336		fam	C.coli	22	15.5	20.5	13	19.632	25	27.934	14.0365	36.166	23.5865	23.5315
	mean Okt	27	14.5	27.5	29.5	40.5		10^3	14.9135	8.065	13.215		10^3	11.957	0	0		red610	Salm	5	3	7.5	3.6	4.148	12	7.041	3.588	13.253	6.0775	12.236
	C.coli jan. 2014	13	18	25	25	30	C.coli	not diluted	27.934	19.632	36.166	C.coli	not diluted	23.5865	14.0365	23.5315		red610	Shig	5.25	3	7.75	3.6	3.339	11	5.985	3.2475	11.118	5.6725	10.73
	1	22	13	18	22	30		10^1	24.253	15.2515	26.7945		10^1	22.081	12.569	20.589		hex	Yers	10.5	6.5	10	5.5	7.704	11	8.778	6.3125	12.263	10.2455	12.819
	2	22	18	22	23	31		10^2	16.917	9.541	21.3755		10^2	19.5175	10.1685	13.076		fam	Stec	19.5	10.25	17.5	15	11.098	20	19.999	14.129	19.4	23.1215	23.4975
	mean Okt 2013	22	15.5	20.5	22.5	30.5		10^3	0	0	15.9195		10^3	0	8.691	6.226		fam	Giardia	13.5	9.25	11	12	9.925	20	18.639	9.8795	19.109	16.2595	16.9155
	Salm jan.2014	3.6	4.3	12	10	15	Salm	not diluted	7.041	4.148	13.253	Salm	not diluted	6.0775	3.588	12.236		hex	Df	14.75	9.75	16	15	15.855	25	14.6	11.2475	25.598	16.3815	19.5055
	1	4	3	7	8.5	12		10^1	57.815	29.915	9.737		10^1	4.485	2.6245	2.0589		red610	Crypto	4.2	3.25	7	2	4.383	10	8.369	2.8375	16.551	4.7565	9.461
	2	5.5	3	8	5	15		10^2	3.563	1.408	6.146		10^2	1.797	0.7535	1.3076		cy5	IC MRP	1.5	0.65	6	0.8	0.592	7	1.14	6.725	5.212	1.1825	5.7385
	meanokt 2013	5	3	7.5	6.75	13.5		10^3	0	0	0		10^3	0	0.697	6.226										14,6 no change after lampunit replacement is different than with the other dyesand Lc480.
																		lc 1
		LC1*	LC2*	LC4	LC5	LC6			LC1	LC2	LC4			LC1 (2)	LC2 (2)	LC4 (2)				Before lamp unit change	After lamp unit change
	Shig	3.6	4.5	11	12	17	Shig	not diluted	5.985	3.339	11.118	Shig	not diluted	5.6725	3.2475	10.73		FAM	C.coli	13	27.934
	1	5	3	7.5	9	14		10^1	5.7135	3.3865	9.2225		10^1	5.1905	2.769	9.206			Stec	15	19.999
	2	5.5	3	8	9	15		10^2	0	3.123	0		10^2	0	2.2205	5.712			G.lamblia	12	18.639
	meanokt 2013	5.25	3	7.75	9	14.5		10^3	0	0	0		10^3	0	0	6.625		HEX	C.jejuni	17	23.342
																			Y.enterocolitica	5.5	8.778
	Yers	5.5	7	11	12	15	Yers	not diluted	8.778	7.704	12.263	Yers	not diluted	10.2455	6.3125	12.819			D.fragilis	15	14.6
	1	10	6	10	12	12		10^1	10.198	6.6965	11.79		10^1	11.8135	4.7275	11.093		Red610	S.enterica	3.6	7.041
	2	11	7	10	12	18		10^2	7.522	5.5015	9.26		10^2	7.0575	3.129	7.397			S.dysenteriae/EIEC	3.6	5.985
	meanokt 2013	10.5	6.5	10	12	15		10^3	0	3.809	7.6155		10^3	4.408	0	0			Cryptosporidium spp.	2	8.369
																		Cy5	MFP1	1.5	1.5
																			MFP2	1.6	1.6
		LC1*	LC2*	LC4	LC5	LC6			LC1	LC2	LC4			LC1 (2)	LC2 (2)	LC4 (2)			MFP3	1.4	1.4
	Stec	15	12	20	20	30	Stec	not diluted	19.999	11.098	19.4	Stec	not diluted	23.1215	14.129	23.4975			MFP4	1.6	1.6
	1	16	8.5	16	19	25		10^1	19.6315	9.8705	17.197		10^1	20.39	11.571	16.121			MRP	0.8	1.14
	2	23	12	19	20	31		10^2	12.753	5.8075	12.2435		10^2	10.304	6.3605	7.987
	meanokt.2013	19.5	10.25	17.5	19.5	28		10^3	8.1685	6.664	11.029		10^3	6.244	0	0		lc 2
																				Before lamp unit change	After lamp unit change
																		FAM	C.coli	19.632	14.0365
		LC1*	LC2*	LC4	LC5	LC6			LC1	LC2	LC4			LC1 (2)	LC2 (2)	LC4 (2)			Stec	11.098	14.129
	Giardia	12	14	20	20	30	Giardia	not diluted	18.639	9.925	19.109	Giardia	not diluted	16.2595	9.8795	16.9155			G.lamblia	9.925	9.8795
	1	12	9.5	11	14	15		10^1	12.2735	8.315	13.9995		10^1	9.4005	5.6735	9.008		HEX	C.jejuni	15.302	16.5745
	2	15	9	11	10	21		10^2	6.834	3.312	5.871		10^2	4.089	1.2775	1.715			Y.enterocolitica	7.704	6.3125
		13.5	9.25	11	12	18		10^3	5.098	0	0		10^3	1.37	0	0			D.fragilis	15.855	11.2475
																		Red610	S.enterica	4.148	3.588
	Df	15	13	25	29	35	Df	not diluted	0	15.855	25.598	Df	not diluted	16.3815	11.2475	19.5055			S.dysenteriae/EIEC	3.339	3.2475
	1	14	11	16	22	22		10^1	0	12.073	21.07		10^1	6.089	6.6345	12.26			Cryptosporidium spp.	4.383	2.8375
	2	15.5	8.5	16	20	25		10^2	0	6.7785	12.3695		10^2	3.383	2.566	3.469		Cy5	MFP1	0.446	0.6
		14.75	9.75	16	21	23.5		10^3	0	3.708	0		10^3	1.513	0	0			MFP2	0.642	0.4
																			MFP3	0.497	0.4
	Crypto	2	3.5	10	10	15	Crypto	not diluted	8.369	4.383	16.551	Crypto	not diluted	4.7565	2.8375	9.461			MFP4	0.749	0.9
	1	4.2	3	7	10	11		10^1	6.484	3.577	11.1275		10^1	2.6175	1.438	3.6435			MRP	0.592	0.6725
	2	x	3.5	7	9	16		10^2	0	1.334	7.824		10^2	0.887	0	0
		4.2	3.25	7	9.5	13.5		10^3	0.11615	0	2.022		10^3	0	0	0
																				LC4 before	LC4 after
		LC1*	LC2*	LC4	LC5	LC6			LC1	LC2	LC4			LC1 (2)	LC2 (2)	LC4 (2)		fam	C.coli	25	36.166
	IC MRP	0.8	0.9	7.0	7	10	IC MRP	not diluted	1.14	0.592	5.212	IC MRP	not diluted	1.1825	6.725	5.7385			Stec	20	19.4
	1	1.5	0.65	6	6.5	8		10^1	1.143	0.574	5.941		10^1	1.3575	0.7065	5.9715			Giardia	20	19.109
	2	1.5	x	6	6.5	8.5		10^2	0.567	0.47	5.159		10^2	1.297	0.6735	5.534
		1.5	0.65	6	6.5	8.25		10^3	0	0	0		10^3	0	0			hex	Cjej	30	20.209
																			Yers	11	12.263
		situation jan.	old lampunit	changing lampunit					LC1	LC2	LC4								Df	25	25.598
		LC2*	LC 2feb	LC2 eind feb			Cymfp1		0.955	0.446	4.553
	Cjej	19	15.302	16.5745			Cy mfp2		1.625	0.642	7.02							red610	Salm	12	13.253
	C.coli	18	19.632	14.0365			Cy mfp3		1.107	0.497	4.429								Shig	11	11.118
	Salm	4.3	4.148	3.588			Cy mfp4		1.735	0.749	7.473								Crypto	10	16.551
	Shig	4.5	3.339	3.2475
	Yers	7	7.704	6.3125														cy5	IC MRP	7	5.212
	Stec	12	11.098	14.129
	Giardia	14	9.925	9.8795
	Df	13	15.855	11.2475														lampunit LC1 to LC4. LC1 and LC4 need to be similar after lampunit change
	Crypto	3.5	4.383	2.8375			Cy5	MFP1	1	1.5		Cy5	MRP	0.8				No similar patern between LC1 and LC4 . Only lampunit change makes no difference. Also spectra of a type 1 LC and a type 2 LC
	IC MRP	0.9	0.592	6.725					2	0.9		Cy5	MFP1	1.5						LC1 before	LC4 after
							Cy5	MFP2	1	1.6		Cy5	MFP2	1.6				fam	C.coli	13	36.166
									2	1.6		Cy5	MFP3	1.4					Stec	15	19.4
							Cy5	MFP3	1	1.4		Cy5	MFP4	1.6					Giardia	12	19.109
									2	1.1
							Cy5	MFP4	1	1.6								hex	Cjej	17	20.209
									2	1.7									Yers	5.5	12.263
																			Df	15	25.598
																		red610	Salm	3.6	13.253
																			Shig	3.6	11.118
																			Crypto	2	16.551
																		cy5	IC MRP	0.8	5.212
																			januar fluorescence lower than in okt.				after lampunit change
																			LC1 voor	LC2 voor	LC4 voor	LC1 na	LC2 na	LC4 na
																	fam	C.coli	13	19.632	25	27.934	14.0365	36.166
																	fam	Stec	15	11.098	20	19.999	14.129	19.4
																	fam	Giardia	12	9.925	20	18.639	9.8795	19.109
																	hex	Cjej	17	15.302	30	23.342	16.5745	20.209
																	hex	Yers	5.5	7.704	11	8.778	6.3125	12.263
																	hex	Df	15	15.855	25	14.6	11.2475	25.598
																	red610	Salm	3.6	4.148	12	7.041	3.588	13.253
																	red610	Shig	3.6	3.339	11	5.985	3.2475	11.118
																	red610	Crypto	2	4.383	10	8.369	2.8375	16.551
																	cy5	IC MRP	0.8	0.592	7	1.14	0.6725	5.212

## Sheet: fluor before lampchange in tijd
										march	april
				after changing lampunit						in time
			LC1 after	LC2 after	LC4 after	LC5	LC6	LC1 time	LC2 time	LC4 time	lc4 time	LC5 time	LC6 time
	hex	Cjej	23.342	16.5745	20.209	30	35	24.451		29.1935	27.6	29.6	39.1
	fam	C.coli	27.934	14.0365	36.166	25	30	23.5865		23.5315	20.5	21.7	30.9
	red610	Salm	7.041	3.588	13.253	10	15	6.0775		12.236	9.8	9.1	15.8
	red610	Shig	5.985	3.2475	11.118	12	17	5.6725		10.73	10.4	9.3	15.7
	hex	Yers	8.778	6.3125	12.263	12	15	10.2455		12.819	11.6	12.9	16.9
	fam	Stec	19.999	14.129	19.4	20	30	23.1215		23.4975	21.7	22.6	28.7
	fam	Giardia	18.639	9.8795	19.109	20	30	16.2595		16.9155	15.7	15.8	20.7
	hex	Df	14.6	11.2475	25.598	29	35	16.3815		19.5055	17.6	19.1	24.8
	red610	Crypto	8.369	2.8375	16.551	10	15	4.7565		9.461	8.2	8	13
	cy5	IC MRP	1.14	0.6725	5.212	7	10	1.1825		5.7385	4.3	4.4	7.2
			LC1 after	LC1 time
	fam	C.coli	27.934	23.5865
		Stec	19.999	23.1215
		Giardia	18.639	16.2595
	hex	Cjej	23.342	24.451
		Yers	8.778	10.2455
		Df	14.6	16.3815
	red610	Salm	7.041	6.0775
		Shig	5.985	5.6725
		Crypto	8.369	4.7565
	cy5	IC MRP	1.14	1.1825
			LC2 after	LC2 time
	fam	C.coli	14.0365
		Stec	14.129											No MFP results after 21-02-2014 on this LC… Lampunit is changed on 10-3-2014
		Giardia	9.8795
	hex	Cjej	16.5745
		Yers	6.3125
		Df	11.2475
	red610	Salm	3.588
		Shig	3.2475
		Crypto	2.8375
	cy5	IC MRP	0.6725	0.62
			LC4 after	LC4 time march	lc4 time april
	fam	C.coli	36.166	23.5315	20.5
		Stec	19.4	23.4975	21.7
		Giardia	19.109	16.9155	15.7
	hex	Cjej	20.209	29.1935	27.6
		Yers	12.263	12.819	11.6
		Df	25.598	19.5055	17.6
	red610	Salm	13.253	12.236	9.8
		Shig	11.118	10.73	10.4
		Crypto	16.551	9.461	8.2
	cy5	IC MRP	5.212	5.7385	4.3
			LC5	LC5 time
	fam	C.coli	25	21.7
		Stec	20	22.6
		Giardia	20	15.8
	hex	Cjej	30	29.6
		Yers	12	12.9
		Df	29	19.1
	red610	Salm	10	9.1
		Shig	12	9.3
		Crypto	10	8
	cy5	IC MRP	7	4.4
			LC6	LC6 time
	fam	C.coli	30	30.9
		Stec	30	28.7
		Giardia	30	20.7
	hex	Cjej	35	39.1
		Yers	15	16.9
		Df	35	24.8
	red610	Salm	15	15.8
		Shig	17	15.7
		Crypto	15	13
	cy5	IC MRP	10	7.2
										march	april
				after changing lampunit						in time
			LC1 after	LC1 time	LC2 after	LC2 time	LC4 after	LC4 time	lc4 time	LC5	LC5 time	LC6	LC6 time
	fam	C.coli	27.934	23.5865	14.0365		36.166	23.5315	20.5	25	21.7	30	30.9
	fam	Stec	19.999	23.1215	14.129		19.4	23.4975	21.7	20	22.6	30	28.7
	fam	Giardia	18.639	16.2595	9.8795		19.109	16.9155	15.7	20	15.8	30	20.7
	hex	Cjej	23.342	24.451	16.5745		20.209	29.1935	27.6	30	29.6	35	39.1
	hex	Yers	8.778	10.2455	6.3125		12.263	12.819	11.6	12	12.9	15	16.9
	hex	Df	14.6	16.3815	11.2475		25.598	19.5055	17.6	29	19.1	35	24.8
	red610	Salm	7.041	6.0775	3.588		13.253	12.236	9.8	10	9.1	15	15.8
	red610	Shig	5.985	5.6725	3.2475		11.118	10.73	10.4	12	9.3	17	15.7
	red610	Crypto	8.369	4.7565	2.8375		16.551	9.461	8.2	10	8	15	13
	cy5	IC MRP	1.14	1.1825	0.6725		5.212	5.7385	4.3	7	4.4	10	7.2
			okt	jan	mrt				okt	jan	mrt
			LC1	LC1	LC1				LC4	LC4	LC4
	fam	bordetella	25	28.8	23.5		fam	bordetella	20	21	18.9
	fam	MTB	27	28	8.2		fam	MTB	26	21	12.3
	fam	PBP	17	18.1	27.7		fam	PBP	17	16.3	25.8
	red610	bordetella		10	18.6		red610	bordetella		11.8	14.8
			okt	jan	mrt				okt	jan	mrt
			LC2	LC2	LC2				LC5	LC5	LC5
	fam	bordetella	15	15	12.3		fam	bordetella	20.7	19.1	19.8
	fam	MTB	16.3	15.3	4.5		fam	MTB	26.3	29	12.8
	fam	PBP	10.5	9.4	16.5		fam	PBP	19	19.8	24.5
	red610	bordetella		5.2	11		red610	bordetella		11.4	17
									okt	jan	mrt
									LC6	LC6	LC6
							fam	bordetella	28.7	28	31.3
							fam	MTB	41	40.8	21.9
							fam	PBP	22	23.8	39.9
							red610	bordetella		20	22

## Sheet: different timepoints
		3 time point to get a could sight in wat happens when
	LC6 type 3									mean LC6
			timepoint 1		timepoint 2		timepoint 3
			cp	fluor	cp	fluor	cp	fluor				timepoint 1	timepoint 2	timepoint 3
	mfp1	C.coli	30,22/30,22	28,8/27,6	30,45/30,25	30,47/28,67	30,22/30,35	29,9/29,1		fam	C.coli	28.2	29.57	29.5
		C.jejuni	33,87/33,81	34,7/33,2	33,86/33,70	31,7/30,3	33,74/33,76	32,7/33,9			stec	30.2	29.1	29.3
		salmonella	30,97/30,93	17,53/17,23	31,06/30,95	16,7/16,5	31,15/31,13	17,0/17,2			giardia	23.5	23	23
		IC	31.87	4.528	31.82	4.642	32.11	4.46		hex	C.jejuni	33.95	31	33.3
	mfp2	shigella	32,51/32,05	16,16/16,06	32,19/32,46	13,4/13,3	32,14/32,49	16,0/16,3			yersinia	14.3	16	14.1
		yersinia	32,59/32,80	14,5/14,1	32,96/32,75	16,1/15,8	32,69/32,74	14,2/14,0			dienta	23.4	22.5	22.5
		IC	31.99	8.066	32.15	8	32.21	7.63		red610	salmonella	17.38	16.6	17.1
	mfp3	stec	31,16/31,46	30,5/29,95	30,91/31,04	29,7/28,5	31,13/31,45	29,3/29,3			shigella	16.11	13.4	16.2
		IC	31.92	5.053	32.05	5.4	32.02	4.84			crypto	12.6	12.5	12.3
	mfp4	dienta	31,14/31,03	23,722/23,122	30,95/30,95	22,6/22,4	30,88/30,88	21,8/23,2		cy5	IC 1	4.53	4.64	4.46
		crypto	30,99/31,05	12,5/12,6	30,81/30,84	12,6/12,4	35,30/30,93	12,2/12,4			IC 2	8.07	8	7.63
		giardia	31,28/31,42	24,47/22,47	31,36/31,11	24,0/22,0	31,08/31,13	23,9/22,1			IC 3	5.05	5.4	4.84
		IC	31.69	8.5	31.56	8.7	31.59	7.9			IC 4	8.5	8.7	7.9
	LC2 type 1									mean LC2
			timepoint 1		timepoint 2		timepoint 3
			cp	fluor	cp	fluor	cp	fluor				timepoint 1	timepoint 2	timepoint 3
	mfp1	C.coli	30,14/30,15	12,493/12,993	30,04/30,06	12,7/13,3	30,11/30,13	13,14/13,44		fam	C.coli	12.65	13	13.29
		C.jejuni	33,69/33,62	16,72/17,12	33,74/33,54	14,6/15,4	33,75/33,63	14,9/15,1			stec	12.38	11.4	11.1
		salmonella	31,01/30,82	3,66/4,16	30,84/30,94	3,6/3,8	30,82/30,80	3,8/4,05			giardia	9.03	9.32	8.91
		IC	31.93	0.436	31.66	0.43	31.92	0.441		hex	C.jejuni	16.97	15	15
	mfp2	shigella	32,42/32,30	3,38/3,42	32,64/31,98	3,27/3,37	32,50/32,52	3,30/3,32			yersinia	6	5.7	5.8
		yersinia	32,51/32,60	5,8/6,07	32,81/32,64	5,6/5,7	32,61/32,80	5,7/5,8			dienta	8.7	8.6	8.38
		IC	31.98	0.708	x	x	31.56	0.485		red610	salmonella	3.96	3.7	3.9
	mfp3	stec	31,19/31,26	12,23/12,53	30,72/30,93	9,7/13,2	30,74/30,89	10,65/11,55			shigella	3.4	3.32	3.31
		IC	31.79	0.465	31.89	0.445	31.73	0.445			crypto	2.3	2.207	2.245
	mfp4	dienta	30,86/30,93	8,58/8,85	30,94/30,73	8,5/8,7	30,81/30,85	8,28/8,48		cy5	IC 1	0.436	0.43	0.441
		crypto	31,12/31,04	2,13/2,47	30,80/30,83	2,057/2,357	30,86/30,89	2,12/2,37			IC 2	0.708	x	0.485
		giardia	31,14/31,10	8,98/9,08	31,03/31,02	9,12/9,52	31,02/31,14	8,61/9,21			IC 3	0.465	0.445	0.445
		IC	31.62	0.632	31.52	0.631	31.52	0.636			IC 4	0.632	0.631	0.636
			timepoint 1	gelijk in lc
			timepoint 2	after 2 hr in LC
			timepoint 3	after 4 hr in LC

## Sheet: roche spectra
lightcycler 480 type I			lightcycler 480 type II
Filter	Excitation	Emission	Filter	Excitation	Emission
	dark	500/20		dark	488/20
fam	450/30	533/20	fam	440/35	510/20
hex	483/35	568/20	hex	465/25	580/20
red610	523/20	610/20	red610	498/40	610/20
cy5	558/30	640/20	cy5	533/25	640/20
cy5.5	615/30	670/20	cy5.5	618/35	660 LP

## Sheet: cleaning lens LC2LC1
			Type I, LC2					2014-01-01
		C+ target	before maintenance lens	after maintenance lens					Type I					Fam					HEX								Red610				Cy5
	FAM	C.coli	18	25			Label	positive control target	before maintenance lens	after maintenance lens				C.coli	STEC	G.lamblia	E.histolytica		C.jejuni	Y.enterocolitica	D.fragilis	E.dispar					Salmonella spp.	S.dysenteriae/EIEC	Cryptosporidium spp.		MRP	MFP1	MFP2	MFP3	MFP4
		STEC	12	24.2			FAM	Bordetella	15	16.4	LC2		before maintenance lens	18	12	14	9		19	7	13	14		LC2		before maintenance lens	4.3	4.5	3.5		0.9	0.65	0.65	0.6	0.75
		Giardia	14	15.9				MTB	15.3	30.9		LC2	after maintenance lens	25	24.2	15.9	33.5		33	16.2	18.4	30.6			LC2	after maintenance lens	5.1	6.2	3.7		0.6	1.2	1.2	1.1	1.3
		E.histolytica	9	33.5				PCP	9.4	19.4		LC1	before changing lampunit	13	15	12	14.7		17	5.5	15				LC1	before changing lampunit	3.6	3.6	2		0.8	1.5	1.6	1.4	1.6
		B.pertus										LC1	after changing lampunit	27.934	19.999	18.639			23.342	8.778	14.6				LC1	after changing lampunit	7.041	5.985	8.369		1.14	1.5	1.6	1.4	1.6											LC1 before	LC1 after
																																												fam	C.coli	13	27.934
																																													Stec	15	19.999
																																													Giardia	12	18.639
	HEX	C.jejuni	19	33
		Yersinia	7	16.2																																								hex	Cjej	17	23.342
		Dienta	13	18.4																																									Yers	5.5	8.778
		E.dispar	14	30.6																																									Df	15	14.6
	Red 610	Salmonella	4.3	5.1																																								red610	Salm	3.6	7.041
		Shigella	4.5	6.2																																									Shig	3.6	5.985
		Crypto	3.5	3.7																																									Crypto	2	8.369
	Cy5	IC-mrp	0.9	0.6																																								cy5	IC MRP	0.8	1.14
		MFP1	0.65	1.2																																									IC MFP1
		MFP2	0.65	1.2																																									IC MFP2
		MFP3	0.6	1.1																																									IC MFP3
		MFP4	0.75	1.3																																									IC MFP4
																													LC1 before	LC1 after
																											fam	C.coli
																												Stec
																												Giardia
																											hex	Cjej
																												Yers
																												Df
																											red610	Salm
																												Shig
																												Crypto
																											cy5	IC MRP
																Red610			Cy5
					G.lamblia		C.jejuni	Y.enterocolitica								Salmonella spp.	S.dysenteriae/EIEC		MRP	MFP1	MFP4
LC2					14		19	7					LC2		before maintenance mirror	4.3	4.5		0.9	0.65	0.75

## Sheet: gebruiken voor artikel
		Before lens maintenance	After lens maintenance
FAM	C.coli	18	25
	Stec	12	24.2
	G.lamblia	14	15.9
HEX	C.jejuni	19	33
	Y.enterocolitica	7	16.2
	D.fragilis	13	18.4
Red610	S.enterica	4.3	5.1
	S.dysenteriae/EIEC	4.5	6.2
	Cryptosporidium spp.	3.5	3.7
Cy5	MFP1	0.65	1.2
	MFP2	0.65	1.2
	MFP3	0.6	1.1
	MFP4	0.75	1.3
LC 1
		Before lamp unit change	After lamp unit change
FAM	B.pertussis	28.8	23.5
	M.tuberculosis	28	28
	P.jiroveci	18.1	27.7
Cy5	MRP	0.8	1.14
LC 2
		Before lamp unit change	After lamp unit change
FAM	B.pertussis	15	12.3
	M.tuberculosis	15.3	16.5
	P.jiroveci	9.4	16.5
Cy5	MRP	0.9	0.6725
LC 2
		Before lens maintenance	After lens maintenance
FAM	B.pertussis	12.3	22.35
	M.tuberculosis	16.5	31.6667
	P.jiroveci	16.5	23.01
Cy5	MRP	0.6725	0.6

## Sheet: Fam monoplex MFP
		FAM multiplex	FAM monoplex	FAM verschil
		LC 1	LC 1	multi - mono
LC1	C.coli	13	22.8695	-9.8695
	Stec	15	25.8585	-10.8585
	Giardia	12	24.7005	-12.7005
	E.histo	11	21.4745	-10.4745
	Bordetella	28.8	24.2085	4.5915
		FAM multiplex	FAM monoplex	FAM verschil
		LC 2	LC 2	multi - mono
LC2	C.coli	18	15.5035	2.4965
	Stec	12	16.485	-4.485
	Giardia	14	15.344	-1.344
	E.histo	9	17.664	-8.664
	Bordetella	15	14.473	0.527
																	ep20141009-emre01
																		LC 1	gemiddelde van exp	lc 1 artikel
		FAM multiplex	FAM monoplex	FAM verschil													PCP	18.407	17.7123	18
		LC 4	LC 4	multi - mono														17.162
LC4	C.coli	25	24.273	0.727														17.997
	Stec	20	28.231	-8.231														17.283
	Giardia	20	20.688	-0.688
	E.histo	13	hex gebruikt	#VALUE!													MTB	32.774	26.7228	28
	Bordetella	21	19.92	1.08														23.798
																		26.209
																		24.11
																	Bordetella	16.946	17.578	29
																		16.585
																		17.083
																		19.698

## Sheet: PCR mix
30
			Component	Positie	stock	eindconc	1 reactie	10 reacties
		coli	roche probe				15	150
			primer 1:Cc-ceuE-fw	A51d	50	0.6	0.36	3.6
			primer 2:Cc-ceuE4-re	A51d	50	0.6	0.36	3.6
			probe:Cc-ceuE-pr-FAM	A51d	25	0.2	0.24	2.4
			water				4.04	40.4
		stec	roche probe				15	150
			Stx1F934-mod	A52c	50	0.3	0.18	1.8
			Stx1F934F-mod1d	A52c	50	0.2	0.12	1.2
			Stx2F-LvI	A53a	50	0.3	0.18	1.8
			Stx2F-mod4-SLE	A54b	50	0.3	0.18	1.8
			Stx1R1042-G	A52d	50	0.15	0.09	0.9
			Stx1R1042-modC	A52d	50	0.15	0.09	0.9
			Stx1R1042-mod1d	A52d	50	0.2	0.12	1.2
			Stx2R-G-LvI	A53a	50	0.3	0.18	1.8
			Stx2R-A-LvI	A53a	50	0.3	0.18	1.8
			Stx2R-mod4-SLE	A54b	50	0.3	0.18	1.8
			Stx1P990-mod-MGB	A53b	100	0.1	0.03	0.3
			Stx1P990-mod1c-MGB	A53b	100	0.1	0.03	0.3
			Stx1P990-mod1d-MGB	A53b	100	0.1	0.03	0.3
			Stx2P-LvI-MGB	A53b	100	0.1	0.03	0.3
			Stx2P-mod3-SLE	A54b	100	0.1	0.03	0.3
			water				3.35	33.5
			roche probe				15	150
		giardia	primer 1: TM-Giardia-80F	A54a	50	0.2	0.12	1.2
			primer 2: TM-Giardia-127R	A54a	50	0.2	0.12	1.2
			Probe : TM-Giardia-105	A54a	25	0.2	0.24	2.4
			water				4.52	45.2
			roche probe				15	150
		Bordetalla	Primer 1: Bp-fw	A48c	50	0.4	0.24	2.4
			Primer 2: Bp-re	A48c	50	0.4	0.24	2.4
			Probe 1: Bp-pr (FAM)	A48c	25	0.2	0.24	2.4
			water				4.28	42.8
			roche probe				15	150
			Primer 3: Bpp-a-fw	A48c	50	0.6	0.36	3.6
			Primer 4: Bpp-re	A48c	50	0.6	0.36	3.6
			Probe 2: Bpp-pr (red610)	A48c	25	0.2	0.24	2.4
			water				4.04	40.4
		e. dispar	Roche probe				15	150
			primer 1: EHD-fw	A36d	50	0.3	0.18	1.8
			primer 2: EHD-re	A36d	50	0.3	0.18	1.8
			probe 1: ED-pr vic	B14b	25	0.2	0.24	2.4
			water				4.4	44
			roche probe				15	150
		oxa-23	fowrad		50	0.3	0.3	3
			reverse		50	0.3	0.3	3
			probe		25	0.2	0.1	1
			water				4.3	43
			roche probe				15	150
	voor efficientie		primer 1: EHD-fw	A36d	50	0.3	0.18	1.8
			primer 2: EHD-re	A36d	50	0.3	0.18	1.8
			probe 1: EH-pr-FAM	A15d	25	0.2	0.24	2.4
			primer 1: Cyano-fw	A36a	50	0.3	0.18	1.8
			primer 2: Cyano-re	A36a	50	0.3	0.18	1.8
			probe: Cyano-pr-670	A36a	25	0.2	0.24	2.4
			water				3.8	38
			roche probe				15	150
	monoplex		primer 1: EHD-fw	A36d	50	0.3	0.18	1.8
			primer 2: EHD-re	A36d	50	0.3	0.18	1.8
			probe 1: EH-pr-FAM	A15d	25	0.2	0.24	2.4
			water				4.4	44

## Sheet: MFP efficiency's
Multiplex	Target	Filter	Efficientie	Afwijking van optimum
MFP 1	CYANO	CY5	2.274	-0.274
MFP 2	CYANO	CY5	2.183	-0.183
MFP 3	CYANO	CY5	2.365	-0.365
MFP 4	CYANO	CY5	2.79	-0.79
MFP 1	C.COLI	FAM	2.368	-0.368
MFP 3	STEC	FAM	2.282	-0.282
MFP 4	GIARDIA	FAM	-	-		verdunning vanuit superstock lukt niet, CP begint ong bij 30
NOG LOS	E.HISTO	FAM	1.985	0.015
MONOPLEX	BORDETELLA	FAM	2.051	-0.051
MONOPLEX	PCP	FAM	1.873	0.127
MONOPLEX	MTB	FAM	1.921	0.079
MFP 1	C.JEJUNI	HEX	1.981	0.019
MFP 2	YERSINIA	HEX	1.953	0.047
MFP 4	DIENTA	HEX	2.009	-0.009
NOG LOS	E.DISPAR	HEX	2.013	-0.013
NOG LOS	E.HISTO	HEX	2.01	-0.01
MFP 1	SALMONELLA	RED 610	1.978	0.022
MFP 2	SHIGELLA	RED 610	2.006	-0.006
MFP 4	CRYPTO	RED 610	-	-
								e.histo hex 2,010
								e.histo fam 1,985

## Sheet: plate for efficiency
Datum		2014-10-06
Experiment		EP20141006-01
Lightcycler		4
Runnummer		EP20141006-01
	1	2	3	4	5	6	7	8	9	10	11	12
	MFP 1	MFP 1	MFP 1	MFP 1	MFP 2	MFP 2	MFP 2	MFP 3	MFP 3	MFP 4	MFP 4	MFP 4
A	fam c.coli	hex c.jejuni	red610 salm	cy5	hex yers	red shig	cy5	fam stec	cy5	fam giardia	hex dienta	red cryp
	10^1	10^1	10^1	10^1	10^1	10^1	10^1	10^1	10^1	10^1	10^1	10^1
B
	10^2	10^2	10^2	10^2	10^2	10^2	10^2	10^2	10^2	10^2	10^2	10^2
C
	10^3	10^3	10^3	10^3	10^3	10^3	10^3	10^3	10^3	10^3	10^3	10^3
D
	10^4	10^4	10^4	10^4	10^4	10^4	10^4	10^4	10^4	10^4	10^4	10^4
E	C+	C+	C+	C+	C+	C+	C+	C+	C+	C+	C+	C+
	FAM			FAM			E. histo
F	C+ C.coli	C+ C.coli	NTC	C+ Giardia	C+ Giardia	NTC	fam
							10^1	10^2	10^3	10^4	C+
	FAM			FAM			E. dispar
G	C+ Stec	C+ Stec	NTC	C+ E.histo	C+ E.histo	NTC	hex
							10^1	10^2	10^3	10^4	C+
	FAM			HEX			MFP 4
H	C+ Bp	C+ Bp	NTC	C+ Bpp	C+ Bpp	NTC	cy5
							10^1	10^2	10^3	10^4	C+

[truncated: 2 more sheets: scatter plot, Blad1]
